# Supplementary material
Source: PubMed Central journal article supplement (PMC9857763)
Supplement: jamadermatol-e225508-s001.pdf [file jamadermatol-e225508-s001.pdf]

## Supplemental Online Content

Zakhem GA, Pulavarty AN, Carucci J, Stevenson ML. Association of patient risk factors, tumor characteristics, and treatment modality with poor outcomes in primary cutaneous squamous cell carcinoma: a systematic review and meta-analysis. *JAMA Dermatol*. Published online December 28, 2022. doi:10.1001/jamadermatol.2022.5508

**eTable 1.** Evaluation of cohort studies – risk factor (level 4 evidence)

**eTable 2.** Results of random effects analysis: risk ratio for each risk factor and distant metastasis, any metastasis, locoregional recurrence, and combined outcomes

**eTable 3.** Incidence proportion for each risk factor modality per outcome across all studies

**eTable 4.** Incidence proportion for each treatment modality per outcome across all studies

**eFigure.** Forest plots of results of random effects analysis: risk ratio for each risk factor- and distant metastasis, any metastasis, and all-cause death identified in more than 1 study

### **eReferences**

This supplemental material has been provided by the authors to give readers additional information about their work.

eTable 1.

| Evaluation of Cohort Studies – Risk Factor (Level 4 Evidence) |                               |                         |                    |                 |                                           |                        |                   |                                                                                                                                                                                              |                                                          |                                                                                                |                   |      |     |
|---------------------------------------------------------------|-------------------------------|-------------------------|--------------------|-----------------|-------------------------------------------|------------------------|-------------------|----------------------------------------------------------------------------------------------------------------------------------------------------------------------------------------------|----------------------------------------------------------|------------------------------------------------------------------------------------------------|-------------------|------|-----|
| Citation                                                      | Author (Year)                 | Location                | Number of patients | Number of cSCCs | Newcastle-Ottawa Scale for Cohort Studies |                        |                   | Risk Factor                                                                                                                                                                                  | Outcomes                                                 | Inclusion Criteria                                                                             | Follow up (years) | REA? | IP? |
|                                                               |                               |                         |                    |                 | Selection (4 stars)                       | Comparability (1 star) | Outcome (3 stars) |                                                                                                                                                                                              |                                                          |                                                                                                |                   |      |     |
| (1)                                                           | Alam et al. (2011)            | United States           | 6271               | 289             | ***                                       | *                      | ***               | Cardiac transplant.                                                                                                                                                                          | All-cause death.                                         | All patients with cutaneous malignancies included in the Cardiac Transplant Research Database. | 10.0              | No   | Yes |
| (2)                                                           | Baker et al. (2001)           | Shoreham-by-the-Sea, UK | 227                | 227             | ***                                       | -                      | **                | Location.                                                                                                                                                                                    | Local recurrence, nodal metastasis.                      | All patients with cSCC of head and neck region excised.                                        | 2.0               | Yes  | Yes |
| (3)                                                           | Breuninger et al. (2012)      | Tübingen, Germany       | 615                | 615             | ***                                       | -                      | **                | Immunosuppression, desmoplasia, location, location, tumor size, poor differentiation.                                                                                                        | Any metastasis.                                          | All patients with invasive SCC.                                                                | 7.0               | No   | No  |
| (4)                                                           | Brinkman et al. (2015)        | Rotterdam, Netherlands  | 131                | 155             | ***                                       | *                      | ***               | Differentiation.                                                                                                                                                                             | Local recurrence, any metastasis, all-cause death.       | All patients with invasive SCC.                                                                | 6.8               | Yes  | Yes |
| (5)                                                           | Brougham et al. (2012)        | Central New Zealand     | 6164               | 8997            | ****                                      | *                      | ***               | Sex, location, perineural invasion, lymphovascular invasion, differentiation.                                                                                                                | Any metastasis.                                          | All patients with SCC in a database covering Central New Zealand.                              | 5.9               | Yes  | No  |
| (6)                                                           | Conde-Ferreiras et al. (2021) | Spain                   | 140                | 124             | ***                                       | *                      | ***               | Perineural invasion.                                                                                                                                                                         | Local recurrence, lymphatic metastasis, all-cause death. | All patients with SCC with incidental perineural invasion.                                     | 3.3               | No   | Yes |
| (7)                                                           | Demirdover et al. (2020)      | Turkey                  | 164                | 164             | **                                        | *                      | ***               | Immunosuppression, perineural or vascular invasion.                                                                                                                                          | Nodal metastasis.                                        | All patients with high-risk features sent for lymph node dissection.                           | 1.3               | Yes  | Yes |
| (8)                                                           | Dimonitsas et al. (2021)      | Greece                  | 1524               | 1524            | ***                                       | *                      | ***               | Age, sex, anatomical site, ulceration, immunosuppression, tumor size, differentiation, invasion beyond subcutaneous fat, perineural invasion, lymphovascular invasion, lymphatic infiltrate. | Local recurrence, lymphatic metastasis, all-cause death. | All patients with cSCC.                                                                        | 4.0               | Yes  | No  |
| (9)                                                           | Dormand et al. (2010)         | London, UK              | 243                | 419             | ***                                       | -                      | **                | Perineural and lymphovascular involvement, differentiation, organ transplantation.                                                                                                           | Local recurrence, any metastasis.                        | All patients with cSCC of the extremities.                                                     | 6.2               | Yes  | Yes |
| (10)                                                          | Duran et al. (2017)           | Boston, Massachusetts   | 100                | 100             | ***                                       | *                      | ***               | Sex.                                                                                                                                                                                         | Local recurrence, nodal metastasis, all-cause death.     | All patients with T2b and T3 cSCCs of the head and neck.                                       | 3.7               | Yes  | No  |
| (11)                                                          | Eigentler et al. (2017)       | Tubingen, Germany       | 1434               | 2149            | ****                                      | *                      | ***               | Tumor thickness, tumor size, poor differentiation, desmoplasia, location, immunosuppression.                                                                                                 | Disease-specific death.                                  | All patients with cSCC.                                                                        | 3.0               | Yes  | Yes |
| (12)                                                          | Fujimoto et al. (2016)        | Wakayama, Japan         | 151                | 171             | **                                        | -                      | ***               | Age > 80, male sex, location, tumor size, tumor thickness, invasion beyond subcutaneous fat, poor differentiation, perineural invasion.                                                      | Nodal metastasis.                                        | All patients with cSCC.                                                                        | 1.0               | Yes  | Yes |
| (13)                                                          | Genders et al. (2018)         | Leiden, The Netherlands | 593                | 1643            | ***                                       | *                      | ***               | Organ transplant, male sex, location, tumor size, poor differentiation.                                                                                                                      | Any metastasis.                                          | All patients diagnosed with primary cSCC.                                                      | 4.0               | Yes  | Yes |
| (14)                                                          | Gonzalez et al. (2017)        | Boston, Massachusetts   | 106                | 412             | ***                                       | *                      | ***               | Immunosuppression.                                                                                                                                                                           | Local recurrence, nodal metastasis.                      | All immunosuppressed patients treated for cSCC.                                                | 4.2               | No   | Yes |
| (15)                                                          | Jansen et al. (2019)          | Essen, Germany          | 114                | 114             | ***                                       | *                      | ***               | Tumor thickness, location, ulceration, perineural invasion, immunosuppression.                                                                                                               | Distant metastasis.                                      | Patients with high risk cSCC who accepted sentinel lymph node biopsy.                          | 2.0               | Yes  | No  |
| (16)                                                          | Kovatch et al. (2018)         | Ann Arbor, Michigan     | 112                | 112             | ***                                       | *                      | ***               | Location.                                                                                                                                                                                    | Local recurrence, any metastasis.                        | All patients with SCC of the ear.                                                              | 2.0               | No   | Yes |

|      |                           |                                                                 |     |     |      |   |     |                                                                                                                                                                |                                                                                                  |                                                                                    |       |     |     |
|------|---------------------------|-----------------------------------------------------------------|-----|-----|------|---|-----|----------------------------------------------------------------------------------------------------------------------------------------------------------------|--------------------------------------------------------------------------------------------------|------------------------------------------------------------------------------------|-------|-----|-----|
| (17) | Manyam et al. (2016)      | Cleveland, Ohio; St. Louis, Missouri; San Francisco, California | 205 | 205 | ***  | - | *** | Immunosuppression, poor differentiation, perineural invasion.                                                                                                  | Local recurrence, all-cause death.                                                               | All patients with cSCC who underwent surgical resection and adjuvant radiotherapy. | 1.9   | Yes | Yes |
| (18) | Manyam et al. (2015)      | Cleveland, Ohio                                                 | 59  | 59  | ***  | * | *** | Immunosuppression, poor differentiation, perineural invasion.                                                                                                  | Local recurrence.                                                                                | All patients with cSCC who underwent surgical resection and adjuvant radiotherapy. | 1.5   | No  | No  |
| (19) | Melo et al. (2014)        | Botucatu, Brazil                                                | 61  | 100 | ***  | * | *** | Location, lymphovascular invasion, perineural invasion.                                                                                                        | Local recurrence.                                                                                | All patients with cSCC of the head and neck with outpatient follow up of > 1 year. | 4.8   | Yes | Yes |
| (20) | Ong et al. (1999)         | Sydney, Australia                                               | 152 | 113 | ***  | - | *** | Organ transplant.                                                                                                                                              | Disease-specific death.                                                                          | All patients undergoing heart transplant.                                          | 6.0   | No  | Yes |
| (21) | Roozeboom et al. (2012)   | Maastricht, The Netherlands                                     | 235 | 235 | ***  | * | *** | Sex, location, immunosuppression.                                                                                                                              | Local recurrence, any metastasis.                                                                | All patients diagnosed with cSCC.                                                  | 3.6   | Yes | Yes |
| (22) | Ross et al. (2009)        | Philadelphia, Pennsylvania                                      | 48  | 48  | ***  | * | *** | Perineural invasion.                                                                                                                                           | Local recurrence, nodal metastasis, distant metastasis, disease-specific death, all-cause death. | All patients with cSCC with perineural invasion.                                   | 3.0   | No  | Yes |
| (23) | Salmon et al. (2011)      | San Francisco, California; Tauranga, New Zealand                | 56  | 56  | ***  | - | *** | Desmoplasia.                                                                                                                                                   | Local recurrence.                                                                                | All patients with desmoplasia identified at 2 centers                              | 3.0   | No  | Yes |
| (24) | Seddon et al. (2016)      | Christchurch, New Zealand                                       | 168 | 168 | **** | * | *** | Sex, immunosuppression, tumor thickness, tumor size, poor differentiation, perineural invasion.                                                                | All-cause death.                                                                                 | All patients with cSCC without HIV, malignancies, or on chemotherapy.              | 6.0   | Yes | Yes |
| (25) | Shaw et al. (2015)        | Auckland, New Zealand                                           | 303 | 303 | **   | - | *** | Immunosuppression.                                                                                                                                             | Local recurrence, disease-specific death.                                                        | All patients with cSCC.                                                            | 14-19 | Yes | Yes |
| (26) | Stevenson et al. (2020)   | New York, New York                                              | 31  | 31  | ***  | * | *** | Perineural invasion.                                                                                                                                           | Local recurrence, nodal metastasis.                                                              | All patients with cSCC and perineural invasion.                                    | > 5.0 | No  | Yes |
| (27) | Tam et al. (2020)         | Houston, Texas                                                  | 796 | 796 | **** | * | *** | Immunosuppression.                                                                                                                                             | Disease-specific death.                                                                          | All patients with cSCC.                                                            | 2.7   | Yes | No  |
| (28) | Terra et al. (2017)       | Groningen, The Netherlands                                      | 151 | 151 | ***  | * | *** | Tumor size, poor differentiation, tumor thickness, perineural invasion, lymphovascular invasion, male sex, age > 70.                                           | Local recurrence.                                                                                | All patients with cSCC of the head and neck treated with radiotherapy.             | 1.9   | Yes | No  |
| (29) | Thiem et al. (2020)       | Rockstock, Germany                                              | 142 | 142 | ***  | * | **  | Location, poor differentiation.                                                                                                                                | Local recurrence.                                                                                | All patients with cSCC of the head and neck treated with excision.                 | 5.0   | Yes | No  |
| (30) | Tomaszewski et al. (2012) | Melbourne, Australia                                            | 42  | 42  | **** | * | **  | CLL.                                                                                                                                                           | Local recurrence, nodal metastasis, distant metastasis, disease-specific death, all-cause death. | All patients with cSCC and CLL.                                                    | 3.6   | No  | Yes |
| (31) | Vinicius et al. (2011)    | São Paulo, Brazil                                               | 55  | 55  | ***  | * | *** | Sex, tumor thickness, lymphovascular invasion, perineural invasion, eGFR positive, HER-2/HER-3/membrane E-cadherin/cytoplasm E-cadherin/podoplanin expression. | Nodal metastasis, disease-specific death.                                                        | All patients with T3 or T4 cSCC.                                                   | 0.8   | Yes | Yes |
| (32) | Yung et al. (2021)        | Sydney, Australia                                               | 297 | 297 | ***  | * | *** | Perineural invasion, location.                                                                                                                                 | Locoregional recurrence, all-cause death, disease-specific death.                                | All patients with cSCC of the vermilion lip.                                       | 4.1   | Yes | Yes |
| (33) | Amaral et al. (2019)      | Tübingen, Germany                                               | 195 | 195 | ***  | - | *** | Tumor thickness.                                                                                                                                               | All-cause death.                                                                                 | All patients with advanced cSCC.                                                   | 1.8   | Yes | No  |
| (34) | Arbab et al. (2019)       | Boston, Massachusetts                                           | 111 | 111 | ***  | * | *** | Perineural invasion, lymphovascular invasion, immunosuppression.                                                                                               | Locoregional recurrence.                                                                         | All patients with advanced cSCC treated with any radiation.                        | 0.6   | Yes | Yes |

|      |                               |                           |     |     |      |   |     |                                                                                                                             |                                                                                                |                                                                                                          |         |     |     |
|------|-------------------------------|---------------------------|-----|-----|------|---|-----|-----------------------------------------------------------------------------------------------------------------------------|------------------------------------------------------------------------------------------------|----------------------------------------------------------------------------------------------------------|---------|-----|-----|
| (35) | Arron et al. (2021)           | 33 clinical sites         | 278 | 278 | ***  | * | *** | Sex, location, immunosuppression, poor differentiation, perineural invasion, invasion beyond subcutaneous fat, 40-GEP risk. | Any metastasis.                                                                                | All patients with head and neck cSCC.                                                                    | 5.0     | Yes | No  |
| (36) | Blechman et al. (2019)        | New York, New York        | 58  | 263 | ***  | - | *** | Immunosuppression.                                                                                                          | Local recurrence, nodal metastasis, disease-specific death.                                    | All immunosuppressed patients treated for cSCC.                                                          | 3.0     | No  | Yes |
| (37) | Bourlidou et al. (2019)       | Thessaloniki, Greece      | 531 | 114 | ***  | * | *** | Poor differentiation.                                                                                                       | Locoregional recurrence.                                                                       | All patients with cSCC of the mid-face.                                                                  | 2.9     | Yes | No  |
| (38) | Bovill et al. (2012)          | United Kingdom            | 84  | 84  | **** | - | *** | Poor differentiation, location.                                                                                             | Locoregional recurrence.                                                                       | All patients with cSCC undergoing re-excision for positive margins.                                      | 2.3     | Yes | No  |
| (39) | Brantsch et al. (2008)        | Tübingen, Germany         | 615 | 615 | **** | * | *** | Tumor thickness, tumor size, poor differentiation, desmoplasia, location, immunosuppression.                                | Any metastasis, local recurrence.                                                              | Patients with cSCC referred by Dermatologists and general practitioners from SW Germany.                 | 3.6     | Yes | Yes |
| (40) | Brewer et al. (2015)          | Olmsted County, Minnesota | 717 | 446 | **** | * | *** | CLL, non-CLL non-Hodgkin's lymphoma, non-Hodgkin's lymphoma.                                                                | Any metastasis, local recurrence.                                                              | All patients with non-Hodgkin's lymphoma and cSCC in the Rochester Epidemiology Project database.        | 0.6     | No  | Yes |
| (41) | Cañueto et al. (2017)         | Spain                     | 94  | 94  | ***  | - | *** | Poor differentiation, lymphovascular invasion, perineural invasion, EGFR over expression.                                   | Nodal metastasis.                                                                              | All patients with cSCCs.                                                                                 | NS      | Yes | Yes |
| (42) | Cañueto et al. (2018)         | Salamanca, Spain          | 90  | 90  | ***  | - | *** | Growth rate.                                                                                                                | Local recurrence, nodal metastasis.                                                            | Randomly selected patients intentionally biased towards a higher proportion of tumors with poor outcomes | 4.2     | Yes | Yes |
| (43) | Carter et al. (2013)          | Boston, Massachusetts     | 114 | 114 | **** | * | *** | Perineural invasion.                                                                                                        | Local recurrence, nodal metastasis, disease-specific death, all-cause death.                   | All patients with cSCC and perineural invasion.                                                          | 2.7-4.0 | No  | No  |
| (44) | Chabrilac et al. (2019)       | Toulouse, France          | 69  | 69  | **** | - | *** | Sex, diabetes, immunosuppression, tumor thickness, tumor size, poor differentiation, perineural invasion.                   | Nodal metastasis.                                                                              | All patients with cSCC undergoing sentinel lymph node biopsy.                                            | 2.0     | Yes | Yes |
| (45) | Conde-Ferreirós et al. (2021) | Salamanca, Spain          | 196 | 196 | ***  | * | *** | T stage.                                                                                                                    | Local recurrence, disease, specific poor outcomes, disease-specific death, distant metastasis. | All patients with T3 cSCC.                                                                               | 4.9     | No  | No  |
| (46) | Durham et al. (2016)          | Ann Arbor, Michigan       | 53  | 54  | ***  | * | **  | Lymphovascular invasion, perineural invasion.                                                                               | Nodal metastasis.                                                                              | All patients with cSCC who underwent wide local excision and sentinel lymph node biopsy.                 | 2.1     | Yes | No  |
| (47) | Dzubow et al. (1982)          | New York, New York        | 414 | 414 | ***  | - | *** | Sex, location, age, diameter.                                                                                               | Local recurrence.                                                                              | All patients treated with Mohs surgery.                                                                  | 1.6     | Yes | Yes |
| (48) | Erkan et al. (2017)           | Murdoch, Australia        | 21  | 21  | ***  | - | **  | Perineural invasion.                                                                                                        | Local recurrence, nodal metastasis.                                                            | All patients with perineural invasion of cranial nerves.                                                 | 1.5     | No  | Yes |
| (49) | Estall et al. (2017)          | Melbourne, Australia      | 235 | 235 | **** | * | *** | Location, immunosuppression, perineural invasion, lymphovascular invasion.                                                  | Local recurrence, nodal metastasis, all-cause death.                                           | All patients with cSCC of the scalp.                                                                     | 4.5     | Yes | Yes |
| (50) | Farberg et al. (2020)         | 23 independent centers    | 300 | 300 | ***  | - | *** | 40-GEP high risk, 40-GEP intermediate risk.                                                                                 | Any metastasis.                                                                                | All patients with high risk cSCC.                                                                        | 4.0     | Yes | Yes |
| (51) | Gore et al. (2016)            | Sydney, Australia         | 57  | 57  | ***  | - | *** | Perineural invasion, lymphovascular invasion.                                                                               | Nodal metastasis.                                                                              | Patients with high risk cSCC undergoing sentinel lymph node biopsy.                                      | 1.6     | Yes | No  |

|      |                                    |                                             |      |      |      |   |     |                                                                                                                                                                                           |                                                                                        |                                                                                                     |       |     |     |
|------|------------------------------------|---------------------------------------------|------|------|------|---|-----|-------------------------------------------------------------------------------------------------------------------------------------------------------------------------------------------|----------------------------------------------------------------------------------------|-----------------------------------------------------------------------------------------------------|-------|-----|-----|
| (52) | Grover et al. (2021)               | Melbourne, Australia                        | 129  | 129  | **** | - | *** | Immunosuppression, perineural invasion, lymphovascular invasion.                                                                                                                          | All-cause death, disease-specific death, local recurrence, or nodal/distal metastasis. | All patients with head and neck cSCC discussed at multi-disciplinary meetings in Western Australia. | 3.7   | Yes | No  |
| (53) | Gupta et al. (2021)                | Boston, Massachusetts; Cleveland, Ohio      | 1297 | 1297 | **** | - | *** | Poor differentiation, location, tumor size, invasion beyond subcutaneous fat, perineural invasion, lymphovascular invasion, age > 65, immunosuppression, organ transplant, CLL.           | Local recurrence, nodal metastasis, distant metastasis, disease-specific death.        | All patients with BWH Stage 2a cSCCs.                                                               | 5.0   | Yes | Yes |
| (54) | Haisma et al. (2016)               | Groningen, The Netherlands                  | 336  | 545  | **** | * | *** | Age > 70, sex, immunosuppression, location, poor differentiation, tumor size, tumor thickness, perineural invasion, lymphovascular invasion.                                              | Nodal metastasis.                                                                      | All biopsies with proven primary head and neck cSCC.                                                | 3.5   | Yes | No  |
| (55) | Harris et al. (2017)               | Sacramento, California                      | 212  | 212  | **** | * | *** | Sex, age > 70, immunosuppression, location, diameter, tumor thickness, poor differentiation.                                                                                              | Nodal metastasis, local recurrence.                                                    | All patients with cSCC undergoing surgery with curative intent.                                     | 2.9   | Yes | No  |
| (56) | Harris et al. (2019)               | Sacramento, California; St. Louis, Missouri | 349  | 349  | **** | * | *** | Age > 70, immunosuppression, perineural invasion.                                                                                                                                         | All-cause death.                                                                       | All patients with cSCC of the head and neck with at least 3 months follow up.                       | 3.1   | Yes | No  |
| (57) | Haug et al. (2020)                 | Tübingen, Germany                           | 1399 | 1399 | ***  | * | *** | Desmoplasia.                                                                                                                                                                              | Local recurrence, nodal metastasis, distant metastasis, disease-specific death.        | All patients with cSCC with follow up information.                                                  | 3.0   | Yes | Yes |
| (58) | Hausauer et al. (2013)             | San Francisco, California                   | 1198 | 376  | ***  | * | *** | HIV.                                                                                                                                                                                      | Local recurrence.                                                                      | All patients with non-genital cSCC.                                                                 | 7.3   | Yes | No  |
| (59) | Jackson et al. (2009)              | Brisbane, Australia; Sydney, Australia      | 97   | 71   | ***  | - | *** | Perineural invasion.                                                                                                                                                                      | Nodal metastasis.                                                                      | All patients with keratinocyte carcinomas.                                                          | 7.0   | No  | Yes |
| (60) | Jambusaria-Pahlajani et al. (2013) | Philadelphia, Pennsylvania                  | 237  | 256  | ***  | * | *** | Poor differentiation, tumor size, perineural invasion, invasion beyond subcutaneous fat, immunosuppression.                                                                               | Local recurrence, nodal metastasis, disease-specific death.                            | All patients with cSCC and one or more of a group of defined risk factors.                          | 3.7   | Yes | No  |
| (61) | Jenkins et al. (2014)              | York, United Kingdom                        | 101  | 101  | ***  | - | **  | Location.                                                                                                                                                                                 | Local recurrence, nodal metastasis.                                                    | All patients with cSCC of the scalp.                                                                | 0.5   | No  | Yes |
| (62) | Kadokia et al. (2016)              | Fort Worth, Texas                           | 53   | 53   | ***  | - | **  | Immunosuppression.                                                                                                                                                                        | Local recurrence, nodal metastasis, distant metastasis.                                | A cohort of immunosuppressed patients with cSCC of the scalp.                                       | > 3.0 | No  | Yes |
| (63) | Kamiya et al. (2020)               | Sapporo, Japan                              | 46   | 46   | ***  | * | *** | Tumor size, tumor thickness, poor differentiation, high PDL-1 intensity.                                                                                                                  | Nodal metastasis.                                                                      | A cohort of patients with cSCC who underwent imaging to assess nodal metastasis.                    | 0.7   | Yes | No  |
| (64) | Karia et al. (2014)                | Boston, Massachusetts                       | 1818 | 974  | **** | * | *** | Sex, immunosuppression, organ transplantation, rheumatoid arthritis immunosuppressive therapy, CLL, location, size, poor differentiation, invasion subcutaneous fat, perineural invasion. | Local recurrence, nodal metastasis, disease-specific death, all-cause death.           | All patients with cSCC.                                                                             | 5.9   | Yes | Yes |
| (65) | Kato et al. (2018)                 | Sapporo, Japan                              | 42   | 42   | ***  | - | *** | Cytokeratin-19 expression.                                                                                                                                                                | Any metastasis.                                                                        | Patients with cSCC.                                                                                 | NS    | Yes | Yes |
| (66) | Knuutila et al. (2020)             | Turku, Finland                              | 207  | 324  | ***  | * | *** | Age, sex, immunocompromised, organ transplant, location, tumor size, poor differentiation.                                                                                                | Any metastasis.                                                                        | All patients treated for cSCC from Finnish Cancer Registry.                                         | 5.0   | Yes | No  |

|      |                          |                               |      |      |      |   |     |                                                                                                                                                             |                                                                            |                                                                                               |       |     |     |
|------|--------------------------|-------------------------------|------|------|------|---|-----|-------------------------------------------------------------------------------------------------------------------------------------------------------------|----------------------------------------------------------------------------|-----------------------------------------------------------------------------------------------|-------|-----|-----|
| (67) | Korhonen et al. (2020)   | Pirkanmaa, Finland            | 774  | 774  | **** | - | *** | Sex, age, immunosuppression, location, poor differentiation, tumor thickness.                                                                               | Local recurrence, any metastasis.                                          | All patients treated for cSCC in a region of Finland extracted from a pathology base.         | NS    | Yes | Yes |
| (68) | Krediet et al. (2015)    | Berlin, Germany               | 143  | 143  | **** | * | **  | Sex, location, poor differentiation, immunosuppression.                                                                                                     | Local recurrence, any metastasis.                                          | All patients treated for cSCC with histopathology and clinical information.                   | 2.0   | Yes | Yes |
| (69) | Kreppel et al. (2013)    | Cologne, Germany              | 63   | 63   | ***  | * | *** | Podoplanin expression, immunosuppression.                                                                                                                   | All-cause death.                                                           | A cohort of treatment-naïve patients with cSCC.                                               | 3.4   | Yes | No  |
| (70) | Kropp et al. (2013)      | Gainesville, Florida          | 36   | 32   | **** | * | *** | Perineural invasion.                                                                                                                                        | Locoregional recurrence or distant metastasis.                             | All patients with cSCC with perineural invasion.                                              | 4.2   | No  | Yes |
| (71) | Kyrgidis et al. (2010)   | Thessaloniki, Greece          | 315  | 315  | **** | - | *** | Perineural invasion, invasion beyond subcutaneous fat.                                                                                                      | Local recurrence or nodal/distant metastasis, all-cause death.             | A cohort of patients with head and neck cSCC.                                                 | 3.9   | Yes | No  |
| (72) | Leibovitch et al. (2005) | Australia                     | 1263 | 315  | ***  | - | *** | Perineural invasion.                                                                                                                                        | Local recurrence.                                                          | All cSCCs treated with Mohs recorded prospectively in a Mohs surgery database.                | > 5.0 | Yes | No  |
| (73) | Leus et al. (2021)       | Groningen, The Netherlands    | 672  | 672  | **** | * | *** | Age > 75.                                                                                                                                                   | Local recurrence, nodal metastasis, distant metastasis.                    | All immunocompetent patients treated for cSCC                                                 | 5.0   | Yes | Yes |
| (74) | Matsumoto et al. (2021)  | Dallas, Texas                 | 842  | 842  | ***  | * | *** | Age > 80, sex, immunosuppression, tumor size, poor differentiation, perineural invasion, invasion beyond subcutaneous fat, location, HIV, organ transplant. | Local recurrence, any metastasis, disease-specific death, all-cause death. | All patients with cSCC.                                                                       | 2.4   | Yes | Yes |
| (75) | Mayo et al. (2017)       | Southampton, United Kingdom   | 192  | 192  | ***  | - | *** | Poor differentiation, tumor thickness, location, ulceration, perineural invasion, lymphovascular invasion.                                                  | Local recurrence, nodal metastasis.                                        | All patients with cSCC of the ear.                                                            | > 2.0 | Yes | Yes |
| (76) | McLaughlin et al. (2017) | Philadelphia, Pennsylvania    | 130  | 383  | ***  | - | *** | Organ transplant.                                                                                                                                           | Nodal metastasis.                                                          | All patients with a history of organ transplant and head and neck cSCC who underwent surgery. | 3.4   | No  | Yes |
| (77) | Mo et al. (2021)         | Philadelphia, Pennsylvania    | 432  | 432  | **** | * | *** | Immunosuppression, poor differentiation, invasion beyond subcutaneous fat, tumor size, location.                                                            | Any metastasis.                                                            | All patients with cSCC > 2 cm located on lip, ear, scalp, or pretibial leg treated with Mohs. | NS    | Yes | Yes |
| (78) | Moore et al. (2005)      | Houston, Texas                | 193  | 193  | ***  | * | *** | Location, lymphovascular invasion, poor differentiation, perineural invasion.                                                                               | Nodal metastasis.                                                          | All patients with cSCC of the head and neck.                                                  | 1.7   | Yes | Yes |
| (79) | Mourouzis et al. (2009)  | West Sussex, United Kingdom   | 194  | 218  | ***  | - | **  | Poor differentiation, location.                                                                                                                             | Nodal metastasis.                                                          | All patients with cSCC of the head and neck treated with surgical excision.                   | 2.5-5 | Yes | Yes |
| (80) | Mullen et al. (2006)     | Houston, Texas                | 136  | 149  | **** | * | *** | Tumor size, poor differentiation.                                                                                                                           | Local recurrence, nodal/distant metastasis, or disease-specific death.     | All patients with cSCC of the trunk and extremities not treated with Mohs.                    | 2.4   | Yes | No  |
| (81) | Nelson et al. (2017)     | Isle of Wight, United Kingdom | 1122 | 1495 | **** | - | *** | Sex, location, tumor size, tumor thickness.                                                                                                                 | Any metastasis, local recurrence.                                          | All patients with cSCC.                                                                       | 6.6   | Yes | No  |
| (82) | Obermeier et al. (2017)  | Munich, Germany               | 99   | 99   | ***  | - | *** | Location, tumor thickness.                                                                                                                                  | Nodal metastasis.                                                          | All patients who underwent inpatient treatment of facial cSCC.                                | 2.8   | Yes | No  |
| (83) | Ogawa et al. (2017)      | Sacramento, California        | 103  | 103  | ***  | * | **  | Acantholytic subtype.                                                                                                                                       | Local recurrence, nodal metastasis.                                        | All patients with acantholytic cSCC.                                                          | 3.0   | No  | Yes |

|      |                         |                                                     |       |       |      |   |     |                                                                                                                                             |                                                                              |                                                                                                                                          |         |     |     |
|------|-------------------------|-----------------------------------------------------|-------|-------|------|---|-----|---------------------------------------------------------------------------------------------------------------------------------------------|------------------------------------------------------------------------------|------------------------------------------------------------------------------------------------------------------------------------------|---------|-----|-----|
| (84) | Oh et al. (2020)        | Seoul, South Korea                                  | 237   | 237   | **** | * | *** | Sex, location, tumor size, poor differentiation, invasion beyond subcutaneous fat, perineural invasion, ulceration.                         | Local recurrence, distant metastasis.                                        | All patients undergoing Mohs surgery.                                                                                                    | 1.5     | Yes | Yes |
| (85) | Saito et al. (2021)     | Niigata, Japan                                      | 540   | 540   | **** | * | *** | Tumor size, tumor thickness, invasion beyond subcutaneous fat, poor differentiation.                                                        | Nodal metastasis.                                                            | All patients who underwent treatment of cSCC.                                                                                            | 3.2     | Yes | No  |
| (86) | Sayan et al. (2020)     | Dorset, United Kingdom                              | 108   | 108   | **** | - | *** | Location, poor differentiation, perineural or lymphovascular invasion.                                                                      | Nodal metastasis.                                                            | All patients with cSCC of the pinna.                                                                                                     | 3.0     | Yes | Yes |
| (87) | Takeda et al. (2013)    | Sagamihara, Japan                                   | 164   | 164   | **** | - | *** | Location.                                                                                                                                   | Nodal metastasis.                                                            | All patients treated for cSCC.                                                                                                           | NS      | Yes | Yes |
| (88) | Tanamal et al. (2022)   | Dallas, Texas                                       | 178   | 178   | ***  | - | *** | Sex, smoker, immunosuppression, perineural invasion, lymphovascular invasion.                                                               | Local recurrence, nodal metastasis, locoregional recurrence.                 | All patients with cSCC of the external ear with >12 months follow up.                                                                    | 2.7     | Yes | Yes |
| (89) | Thomas et al. (2007)    | Danville, Pennsylvania                              | 174   | 99    | ***  | - | *** | Poor differentiation.                                                                                                                       | Local recurrence.                                                            | All patients with poorly differentiated cSCC, DFSP, MAC, EMPD, MCC, and sebaceous carcinoma.                                             | 3.3     | No  | Yes |
| (90) | Tschetter et al. (2020) | Pittsburg, Pennsylvania                             | 637   | 745   | ***  | * | *** | Sex, immunosuppression, tumor thickness, tumor size, location, poor differentiation, invasion beyond subcutaneous fat, perineural invasion. | Local recurrence, nodal metastasis, disease-specific death, all-cause death. | All patients with cSCC treated with Mohs surgery over a 25-working day period.                                                           | 5.1     | Yes | No  |
| (91) | van Lee et al. (2019)   | Rotterdam, the Netherlands; Zwolle, the Netherlands | 631   | 738   | **** | * | **  | Tumor size.                                                                                                                                 | Local recurrence.                                                            | All patients receiving treatment with standard excision or Mohs surgery for cSCC of the head and neck.                                   | 0.4-0.5 | Yes | No  |
| (92) | Venables et al. (2019)  | England                                             | 93890 | 93890 | ***  | * | *** | Sex, age, location, immunosuppression.                                                                                                      | Any metastasis, all-cause death.                                             | All patients with first cSCC identified in the English National Cancer Registration and Analysis Service database between 2013 and 2015. | 1.3     | Yes | Yes |
| (93) | Warren et al. (2016)    | Brisbane, Australia                                 | 50    | 50    | **** | - | *** | Perineural invasion.                                                                                                                        | Local recurrence, nodal/distant metastasis, disease-specific death.          | Cohort of patients with cSCC with perineural invasion.                                                                                   | 4.2     | No  | Yes |
| (94) | Wu et al. (2020)        | Boston, Massachusetts                               | 84    | 84    | **** | * | *** | Immunosuppression.                                                                                                                          | Local recurrence, nodal metastasis, or disease-specific death.               | All patients with head and neck cSCC undergoing sentinel lymph node biopsy.                                                              | 1.7     | Yes | No  |
| (95) | Xiong et al. (2020)     | Cleveland, Ohio                                     | 366   | 366   | ***  | * | *** | Sex, immunosuppression, poor differentiation, invasion beyond subcutaneous fat, perineural invasion, tumor size.                            | Local recurrence, nodal/distant metastasis, disease-specific death.          | All patients with cSCC.                                                                                                                  | 2.8     | Yes | Yes |
| (96) | Xu et al. (2018)        | San Francisco, California                           | 101   | 101   | **** | * | *** | Immunosuppression, lymphovascular invasion                                                                                                  | Locoregional recurrence.                                                     | All patients with cSCC receiving surgery and radiotherapy.                                                                               | 2.0     | Yes | No  |
| (97) | Warren et al. (2016)    | Brisbane, Queensland, Australia                     | 120   | 120   | **** | * | **  | Perineural invasion.                                                                                                                        | Nodal metastasis, distant metastasis.                                        | All patients with high-risk SCCs with perineural invasion.                                                                               | 5.0     | No  | Yes |

\*NS: not stated.

eTable 1 (cont)

| Evaluation of Case-Control Studies – Risk Factors (Level 3 Evidence) |                                 |                                             |                    |                |                                                 |                         |                   |                                                                                                                                                                        |                                                                     |                                                                                                                                                     |                   |     |     |
|----------------------------------------------------------------------|---------------------------------|---------------------------------------------|--------------------|----------------|-------------------------------------------------|-------------------------|-------------------|------------------------------------------------------------------------------------------------------------------------------------------------------------------------|---------------------------------------------------------------------|-----------------------------------------------------------------------------------------------------------------------------------------------------|-------------------|-----|-----|
| Study number                                                         | Author (year)                   | Location                                    | Number of patients | Number of cSCC | Newcastle-Ottawa Scale for Case-Control Studies |                         |                   | Risk Factor                                                                                                                                                            | Outcomes                                                            | Inclusion Criteria                                                                                                                                  | Follow up (years) | OR? | IP? |
|                                                                      |                                 |                                             |                    |                | Selection (4 stars)                             | Comparability (1 stars) | Outcome (3 stars) |                                                                                                                                                                        |                                                                     |                                                                                                                                                     |                   |     |     |
| (98)                                                                 | Agar et al. (2015)              | New Zealand                                 | 49                 | 49             | ***                                             | -                       | ***               | Tumor thickness, differentiation, location, pattern of invasion, perineural invasion.                                                                                  | Nodal metastasis.                                                   | All patients with cSCC with metastatic spread and 32 case-matched controls.                                                                         | NS                | Yes | No  |
| (99)                                                                 | Fujimoto et al. (2019)          | Wakayama, Japan                             | 48                 | 48             | ***                                             | *                       | ***               | Age, sex, location, tumor size, tumor thickness, tumor thickness, invasion beyond subcutaneous fat, poor differentiation, perineural invasion.                         | Nodal metastasis.                                                   | Patients with metastasizing cSCCs < 4 cm and 24 matched non-metastasizing cSCCs.                                                                    | 4.4               | No  | No  |
| (100)                                                                | García-Pedrero et al. (2017)    | Oviedo, Spain                               | 100                | 100            | ***                                             | *                       | ***               | Tumor PDL-1 expression.                                                                                                                                                | Nodal metastasis.                                                   | Patients with cSCC with nodal metastasis and 50 random controls without metastasis.                                                                 | > 4.0             | Yes | No  |
| (101)                                                                | Gonzalez-Guerrero et al. (2017) | Oviedo, Spain                               | 98                 | 98             | **                                              | *                       | ***               | Sex, tumor thickness, tumor size, poor differentiation, desmoplasia, location, immunosuppression, perineural invasion, lymphovascular invasion, tumor budding.         | Nodal metastasis.                                                   | Patients with cSCC with nodal metastasis and 49 random controls without metastasis.                                                                 | 4.3               | Yes | No  |
| (102)                                                                | Hernández-Ruiz et al. (2019)    | Spain                                       | 102                | 102            | **                                              | *                       | ***               | Location, tumor size, immunosuppression, poor differentiation, tumor thickness, perineural invasion, lymphovascular invasion, desmoplasia, tumor budding.              | Any metastasis.                                                     | Consecutive patients with cSCC with nodal metastasis and 52 matched controls without metastasis.                                                    | > 5.0             | Yes | No  |
| (103)                                                                | Karayannopoulou et al. (2020)   | Lyon, France                                | 52                 | 52             | **                                              | -                       | ***               | Tumor budding, tumor size.                                                                                                                                             | Local recurrence, distant metastasis, or nodal metastasis.          | Organ transplant recipients with aggressive cSCC and 27 matched controls without metastasis.                                                        | NS                | Yes | No  |
| (104)                                                                | Khandelwal et al. (2016)        | Shreveport, Louisiana                       | 37                 | 37             | ***                                             | *                       | ***               | Location, tumor size, lymphovascular invasion, perineural invasion.                                                                                                    | Nodal metastasis.                                                   | Patients with parotid metastasis and 17 patients without parotid metastasis.                                                                        | NS                | Yes | No  |
| (105)                                                                | Lobl et al. (2022)              | Los Angeles, California and Omaha, Nebraska | 260                | 260            | ****                                            | *                       | ***               | Poor differentiation, perineural invasion, lymphovascular invasion, tumor size, hyperthyroidism, invasion beyond subcutaneous fat, immunosuppression, smoking history. | Nodal metastasis.                                                   | cSCCs with nodal metastasis and 195 site matched controls.                                                                                          | 5.1               | Yes | No  |
| (106)                                                                | Munguía-Calzada et al. (2019)   | Oviedo, Spain                               | 100                | 100            | ***                                             | *                       | ***               | Fak expression, cortactin expression.                                                                                                                                  | Nodal metastasis, disease-specific death, all-cause death.          | Consecutive patients with head and neck cSCC with nodal metastases and 50 random primary cSCC patients without metastasis with 4 years of follow-up | > 4.0             | Yes | No  |
| (107)                                                                | Cañueto et al. (2019)           | Salamanca, Spain                            | 186                | 186            | ****                                            | -                       | ***               | Poor differentiation, perineural invasion, invasion beyond subcutaneous fat, immunosuppression, history of smoking, thickness.                                         | Local recurrence, nodal/distant metastasis, disease-specific death. | All patients with cSCC and poor outcomes and complete clinical data and 1 of every 10 consecutive patients with cSCC and good outcomes.             | 6.6               | Yes | No  |
| (108)                                                                | Cheng et al. (2018)             | New Haven, Connecticut                      | 98                 | 98             | **                                              | -                       | ***               | Organ transplant.                                                                                                                                                      | Nodal metastasis, all-cause death.                                  | All patients with cSCC at compared with 40 random controls.                                                                                         | 3.8               | Yes | Yes |
| (109)                                                                | Gonzalez et al. (2019)          | Boston, Massachusetts (Tufts)               | 318                | 703            | ****                                            | *                       | ***               | Immunosuppression, organ transplant.                                                                                                                                   | Local recurrence, nodal metastasis.                                 | 1:2 matched cSCCs comparing immunosuppressed patients to controls.                                                                                  | 2.9               | Yes | No  |



|       |                               |                                |     |      |      |   |     |                                                                               |                                           |                                                                                                                                               |       |     |     |
|-------|-------------------------------|--------------------------------|-----|------|------|---|-----|-------------------------------------------------------------------------------|-------------------------------------------|-----------------------------------------------------------------------------------------------------------------------------------------------|-------|-----|-----|
| (110) | Kanitakis et al. (2015)       | Thessaloniki, Greece           | 375 | 1244 | **   | - | *** | Organ transplant.                                                             | Local recurrence, any metastasis.         | All organ transplant patients developing cSCC and a subsequent case-control study comparing 34 patients with aggressive cSCC and 25 controls. | NS    | No  | Yes |
| (111) | Karayannopoulou et al. (2016) | Thessaloniki, Greece           | 52  | 52   | ***  | - | *** | Organ transplant.                                                             | Locoregional recurrence.                  | Organ transplant patients with aggressive cSCCs and 21 organ transplant patients without cSCCs.                                               | NS    | No  | No  |
| (112) | Krediet et al. (2016)         | Berlin, Germany                | 30  | 30   | ***  | * | *** | Lymphatic vascular density.                                                   | Any metastasis.                           | Patients with metastatic cSCC and 15 patients with matched non-metastatic cSCC                                                                | 2.8   | Yes | No  |
| (113) | Peat et al. (2012)            | Auckland, New Zealand          | 170 | 170  | **** | * | *** | Immunosuppression, ulceration, poor differentiation, lymphovascular invasion. | Any metastasis.                           | All patients with metastatic cSCCs compared to 92 control patients.                                                                           | > 5.0 | Yes | No  |
| (114) | Santos-Juanes et al. (2019)   | Oviedo, Spain                  | 100 | 100  | ***  | * | *** | Lectin-like transcript 1 expression.                                          | Nodal metastasis, disease-specific death. | 50 cSCC with nodal metastasis and 50 randomly selected controls without metastasis                                                            | > 4.0 | Yes | No  |
| (115) | Sepehripour et al. (2020)     | East Grinstead, United Kingdom | 88  | 88   | ***  | * | *** | Location, poor differentiation.                                               | Local recurrence.                         | All patients with cSCC with local recurrence after surgical excision with age and size matched controls.                                      | > 5.0 | Yes | No  |

eTable 1 (cont)

| Evaluation of Studies – Treatment |                                |                                    |              |                   |                    |                 |                        |                        |                            |                                                                     |                                                                              |                                                                                                   |                   |
|-----------------------------------|--------------------------------|------------------------------------|--------------|-------------------|--------------------|-----------------|------------------------|------------------------|----------------------------|---------------------------------------------------------------------|------------------------------------------------------------------------------|---------------------------------------------------------------------------------------------------|-------------------|
| Study Number                      | Author (Year)                  | Location                           | Study Type   | Level of Evidence | Number of Patients | Number of cSCCs | Newcastle-Ottawa Scale |                        |                            | Treatment                                                           | Outcomes                                                                     | Inclusion Criteria                                                                                | Follow up (years) |
|                                   |                                |                                    |              |                   |                    |                 | Selection (4 stars)    | Comparability (1 star) | Outcome/Exposure (3 stars) |                                                                     |                                                                              |                                                                                                   |                   |
| (116)                             | Howard et al. (2012)           | Tallahassee, Florida               | Cohort       | 4                 | 1149               | 133             | ****                   | *                      | ***                        | Radiotherapy.                                                       | Local recurrence.                                                            | All patients with non-aggressive cSCCs treated with superficial X-ray therapy.                    | 2.6               |
| (28)                              | Terra et al. (2017)            | Groningen, The Netherlands         | Cohort       | 4                 | 151                | 52              | ***                    | *                      | ***                        | Radiotherapy.                                                       | Local recurrence.                                                            | All patients with cSCC of the head and neck treated with radiotherapy.                            | 1.9               |
| (29)                              | Thiem et al. (2020)            | Rockstock, Germany                 | Cohort       | 4                 | 142                | 142             | ***                    | *                      | **                         | Excision.                                                           | Local recurrence.                                                            | All patients with cSCC of the head and neck treated with excision.                                | 0.4               |
| (34)                              | Arbab et al. (2019)            | Boston, Massachusetts              | Cohort       | 4                 | 111                | 111             | ***                    | *                      | ***                        | Radiotherapy.                                                       | Locoregional recurrence.                                                     | All cases of advanced cSCC treated with any radiation.                                            | 0.6               |
| (47)                              | Dzubow et al. (1982)           | New York, New York                 | Cohort       | 4                 | 414                | 414             | ***                    | -                      | ***                        | Mohs micrographic surgery.                                          | Local recurrence.                                                            | All patients treated with Mohs surgery.                                                           | 1.6               |
| (117)                             | Hernández-Machin et al. (2007) | Las Palmas de Gran Canarias, Spain | Cohort       | 4                 | 710                | 106             | ****                   | *                      | ***                        | Radiotherapy.                                                       | Local recurrence.                                                            | All patients treated with radiotherapy with curative intent.                                      | > 1.0             |
| (118)                             | Kim et al. (2018)              | New York, New York                 | Cohort       | 4                 | 71                 | 46              | ****                   | -                      | ***                        | Radiotherapy.                                                       | Disease-specific death.                                                      | All patients with T3/T4 non-melanoma skin cancer treated with radiotherapy.                       | 0.8               |
| (119)                             | Košec et al. (2013)            | Zagreb, Croatia                    | Cohort       | 4                 | 103                | 103             | ****                   | -                      | ***                        | Surgical excision.                                                  | Local recurrence, nodal metastasis.                                          | All patients with head and neck cSCC treated with surgical excision.                              | > 3.0             |
| (120)                             | Leibovitch et al. (2005)       | Australia                          | Cohort       | 4                 | 1263               | 229             | ***                    | -                      | ***                        | Mohs micrographic surgery.                                          | Local recurrence, nodal/distant metastasis.                                  | All histologically confirmed cSCC treated with Mohs recorded by Australian Mohs surgery database. | 5.0               |
| (90)                              | Tschetter et al. (2020)        | Pittsburg, Pennsylvania            | Cohort       | 4                 | 637                | 745             | ***                    | *                      | ***                        | Mohs micrographic surgery.                                          | Local recurrence, nodal metastasis, disease-specific death, all-cause death. | All patients with cSCC treated by Mohs surgery over a 25-working day period.                      | 5.1               |
| (121)                             | Choi et al. (2017)             | Busan, South Korea                 | RCT          | 2                 | 45                 | 45              | &                      | &                      | &                          | AFL-PDT, MAL-PDT.                                                   | Local recurrence.                                                            | Selected patients with microinvasive cSCC randomized to receive AFL- or MAL-PDT, single-blind.    | 2.0               |
| (122)                             | Ruiz et al. (2020)             | Boston, Massachusetts              | Case-control | 3                 | 62                 | 62              | ****                   | -                      | ***                        | Surgical excision, surgery, and radiotherapy.                       | Nodal metastasis.                                                            | All patients with cSCC at a single institution treated with curative intent.                      | 2.7-4.1           |
| (123)                             | Diana et al. (2020)            | Zurich, Switzerland                | Cohort       | 4                 | 145                | 159             | ****                   | *                      | ***                        | Radiotherapy                                                        | Local recurrence.                                                            | All patients with periocular lesions.                                                             | 3.6               |
| (124)                             | Hutting et al. (2018)          | The Netherlands                    | Cohort       | 4                 | 152                | 160             | ***                    | *                      | ***                        | Excision with whole section intraoperative frozen section analysis. | Local recurrence, any metastasis.                                            | All patients with cSCCs treated with surgical excision.                                           | 3.4               |
| (125)                             | Stanciu et al. (2020)          | Bucharest, Romania                 | Cohort       | 4                 | 1356               | 1356            | ****                   | *                      | ***                        | Mohs micrographic surgery.                                          | Local recurrence.                                                            | All skin lesions treated with Mohs micrographic surgery.                                          | NS                |

|       |                               |                                                      |        |   |      |      |      |   |     |                                              |                                                                                                 |                                                                                                        |         |
|-------|-------------------------------|------------------------------------------------------|--------|---|------|------|------|---|-----|----------------------------------------------|-------------------------------------------------------------------------------------------------|--------------------------------------------------------------------------------------------------------|---------|
| (126) | Fernanda Sachse et al. (1988) | Lisbon, Portugal                                     | Cohort | 4 | 545  | 623  | ***  | * | *** | Cryotherapy.                                 | Local recurrence.                                                                               | All patients with Bowen's disease, lentigo maligna, SCCs, or BCCs                                      | NS      |
| (127) | Marrazzo et al. (2019)        | Hickory, North Carolina, and Pittsburg, Pennsylvania | Cohort | 4 | 647  | 647  | **** | * | *** | Mohs micrographic surgery.                   | Local recurrence, nodal metastasis, distant metastasis, any metastasis, disease-specific death. | All patients with high-risk SCCs                                                                       | 3.0     |
| (128) | Pereira et al. (1994)         | Barreiro, Portugal                                   | Cohort | 4 | 224  | 224  | ***  | * | **  | Cryotherapy.                                 | Local recurrence.                                                                               | All patients treated with cryotherapy and 4 years of follow-up                                         | 4.0     |
| (129) | Turner et al. (2000)          | Newcastle upon Tyre, United Kingdom                  | Cohort | 4 | 61   | 61   | **** | * | **  | Mohs micrographic surgery.                   | Local recurrence, any metastasis.                                                               | All patients with SCC treated with Mohs micrographic surgery with follow-up.                           | 4.0     |
| (2)   | Baker et al. (2001)           | Shoreham-by-the-Sea, UK                              | Cohort | 4 | 227  | 227  | ***  | - | **  | Standard excision.                           | Local recurrence, nodal metastasis, all-cause death                                             | All patients with cSCC of head and neck region excised.                                                | 2.0     |
| (4)   | Brinkman et al. (2015)        | Rotterdam, Netherlands                               | Cohort | 4 | 131  | 155  | ***  | * | *** | Differentiation.                             | Local recurrence, any metastasis, all-cause death.                                              | All patients with invasive SCC.                                                                        | 6.8     |
| (21)  | Roozeboom et al. (2012)       | Maastricht, The Netherlands                          | Cohort | 4 | 235  | 235  | ***  | * | *** | Sex, location, immunosuppression.            | Local recurrence, any metastasis.                                                               | All patients diagnosed with cSCC.                                                                      | 3.6     |
| (35)  | Arron et al. (2021)           | 33 clinical sites                                    | Cohort | 4 | 278  | 278  | ***  | * | *** | Mohs micrographic surgery, standard excision | Any metastasis.                                                                                 | All patients with head and neck cSCC.                                                                  | 5.0     |
| (53)  | Gupta et al. (2021)           | Boston, Massachusetts; Cleveland, Ohio               | Cohort | 4 | 1297 | 1297 | **** | - | *** | Mohs micrographic surgery, standard excision | Local recurrence, nodal metastasis, distant metastasis, disease-specific death.                 | All patients with BWH Stage 2a cSCCs.                                                                  | 5.0     |
| (74)  | Matsumoto et al. (2021)       | Dallas, Texas                                        | Cohort | 4 | 842  | 842  | ***  | * | *** | Mohs micrographic surgery                    | Local recurrence, any metastasis, disease-specific death                                        | All patients with cSCC.                                                                                | 2.4     |
| (84)  | Oh et al. (2020)              | Seoul, South Korea                                   | Cohort | 4 | 237  | 237  | **** | * | *** | Mohs micrographic surgery                    | Local recurrence, distant metastasis.                                                           | All patients undergoing Mohs surgery.                                                                  | 1.5     |
| (91)  | van Lee et al. (2019)         | Rotterdam, the Netherlands; Zwolle, the Netherlands  | Cohort | 4 | 631  | 738  | **** | * | **  | Mohs micrographic surgery, standard excision | Local recurrence, any metastasis, all-cause death.                                              | All patients receiving treatment with standard excision or Mohs surgery for cSCC of the head and neck. | 0.4-0.5 |
| (95)  | Xiong et al. (2020)           | Cleveland, Ohio                                      | Cohort | 4 | 366  | 366  | ***  | * | *** | Mohs micrographic surgery, standard excision | Local recurrence, nodal/distant metastasis, disease-specific death.                             | All patients with cSCC.                                                                                | 2.8     |

\*NS: not stated. & Refer to Supplemental Table 1 for Risk of Bias Assessment.

**eTable 2. Results of random effects analysis: risk ratio for each risk factor and distant metastasis, any metastasis, locoregional recurrence, and combined outcomes**

| <b>Distant metastasis</b>            |                            |                   |                          |                      |
|--------------------------------------|----------------------------|-------------------|--------------------------|----------------------|
| <i>Risk Factor</i>                   | <i>Risk ratio (95% CI)</i> | <i>p-value</i>    | <i>Number of Studies</i> | <i>I<sup>2</sup></i> |
| Desmoplasia                          | 17.3 (4.4 - 68.4)          | <b>&lt;0.0001</b> | 1                        | 0                    |
| Lymphovascular Invasion              | 9.3 (1.3 - 66.0)           | <b>0.0257</b>     | 1                        | 0                    |
| Perineural invasion                  | 4.8 (2.2 - 10.4)           | <b>&lt;0.0001</b> | 3                        | 0                    |
| Poor Differentiation                 | 3.9 (1.9 - 8.2)            | <b>0.0003</b>     | 2                        | 0                    |
| Age > 65                             | 3.1 (0.4 - 23.7)           | 0.2770            | 1                        | 0                    |
| Invasion Beyond Subcutaneous Fat     | 2.8 (0.4 - 20.9)           | 0.3194            | 1                        | 0                    |
| Location on Ear or Lip               | 2.1 (0.5 - 9.3)            | 0.3373            | 1                        | 0                    |
| Solid Organ Transplant               | 1.9 (0.5 - 7.8)            | <b>0.3517</b>     | 1                        | 0                    |
| Tumor Thickness ≥ 2 mm               | 1.7 (0.6 - 4.4)            | <b>0.3085</b>     | 1                        | 0                    |
| Ulceration                           | 1.6 (0.5 - 5.1)            | 0.4509            | 2                        | 0                    |
| Location on Head and Neck            | 1.1 (0.3 - 3.8)            | 0.8500            | 1                        | 0                    |
| Tumor Thickness ≥ 6 mm               | 1.1 (0.3 - 4.0)            | 0.8857            | 1                        | 0                    |
| Immunosuppression                    | 0.9 (0.4 - 2.2)            | 0.8279            | 2                        | 0                    |
| Tumor Size ≥ 2 cm                    | 0.8 (0.1 - 5.7)            | 0.8263            | 2                        | 0                    |
| Male Sex                             | 0.8 (0.3 - 2.0)            | 0.5933            | 1                        | 0                    |
| <b>Any metastasis</b>                |                            |                   |                          |                      |
| <i>Risk Factor</i>                   | <i>Risk ratio (95% CI)</i> | <i>p-value</i>    | <i>Number of Studies</i> | <i>I<sup>2</sup></i> |
| Tumor Thickness ≥ 4 mm               | 12.5 (5.0 - 31.6)          | <b>&lt;0.0001</b> | 1                        | 0                    |
| Relative area occupied by lymphatics | 9.1 (1.0 - 86.8)           | 0.0554            | 1                        | 0                    |
| Tumor Size ≥ 5 cm                    | 5.8 (2.5 - 13.5)           | <b>&lt;0.0001</b> | 1                        | 0                    |
| Tumor Thickness ≥ 2 mm               | 5.2 (1.5 - 17.4)           | <b>0.0080</b>     | 1                        | 0                    |
| Perineural invasion                  | 5.0 (2.3 - 11.1)           | <b>0.0001</b>     | 6                        | 0                    |
| Invasion Beyond Subcutaneous Fat     | 4.0 (2.4 - 6.5)            | <b>&lt;0.0001</b> | 6                        | 14.3                 |
| Lymphovascular Invasion              | 3.2 (2.1 - 5.0)            | <b>&lt;0.0001</b> | 4                        | 61.2                 |
| 40-GEP High Risk                     | 3.0 (1.0 - 8.5)            | <b>0.0431</b>     | 2                        | 0                    |
| Poor Differentiation                 | 2.9 (1.6 - 5.1)            | <b>0.0002</b>     | 13                       | 25.9                 |
| Location on Head and Neck            | 2.9 (0.7 - 12.3)           | 0.1548            | 3                        | 0                    |
| Tumor Size ≥ 2 cm                    | 2.9 (1.6 - 5.1)            | <b>0.0004</b>     | 6                        | 0                    |
| Age > 60                             | 2.6 (0.1 - 58.1)           | 0.5526            | 2                        | 0                    |
| Tumor Budding                        | 2.0 (1.3 - 3.2)            | <b>0.0019</b>     | 1                        | 0                    |
| Tumor Thickness ≥ 6 mm               | 2.0 (1.3 - 3.1)            | <b>0.0026</b>     | 2                        | 0                    |
| Location on Ear                      | 2.0 (1.2 - 3.2)            | <b>0.0059</b>     | 9                        | 25.7                 |
| Location on Lip                      | 1.8 (1.4 - 2.4)            | <b>&lt;0.0001</b> | 8                        | 6.4                  |
| Solid Organ Transplant               | 1.8 (0.7 - 4.9)            | 0.2480            | 3                        | 11.5                 |
| Location on Ear or Lip               | 1.7 (0.7 - 4.6)            | 0.2592            | 1                        | 0                    |
| Immunosuppression                    | 1.6 (1.2 - 2.2)            | <b>0.0041</b>     | 11                       | 18.5                 |
| 40-GEP Moderate Risk                 | 1.5 (1.1 - 2.2)            | <b>0.0194</b>     | 2                        | 0                    |
| Male Sex                             | 1.5 (1.2 - 2.0)            | <b>0.0013</b>     | 10                       | 0                    |
| Location on Scalp                    | 1.5 (1.0 - 2.1)            | <b>0.0444</b>     | 6                        | 32.9                 |
| Age > 70                             | 1.4 (0.2 - 11.1)           | 0.7430            | 2                        | 0                    |
| Desmoplasia                          | 1.4 (0.5 - 3.7)            | 0.5148            | 3                        | 25                   |
| Lymphatic Vascular Density           | 1.1 (1.0 - 1.2)            | 0.0734            | 1                        | 0                    |
| Age > 80                             | 1.1 (1.0 - 1.2)            | 0.2171            | 4                        | 0                    |
| Ulceration                           | 1.1 (0.5 - 2.4)            | 0.8683            | 3                        | 0                    |
| Tumor Size ≥ 4 cm                    | 1.0 (0.2 - 5.0)            | 0.9971            | 1                        | 0                    |
| Age > 90                             | 1 (0.8 - 1.1)              | 0.6013            | 1                        | 0                    |

| <b>All-cause death</b>           |                            |                |                          |                      |
|----------------------------------|----------------------------|----------------|--------------------------|----------------------|
| <i>Risk Factor</i>               | <i>Risk ratio (95% CI)</i> | <i>p-value</i> | <i>Number of Studies</i> | <i>I<sup>2</sup></i> |
| Age > 90                         | 5.6 (5.3 - 5.8)            | <0.0001        | 1                        | 0                    |
| Location on Head and Neck        | 2.7 (1.3 - 5.9)            | 0.0108         | 1                        | 0                    |
| Immunosuppression                | 2.7 (1.5 - 4.6)            | 0.0004         | 7                        | 35.86                |
| Tumor Thickness ≥ 5 mm           | 2.1 (0.8 - 5.7)            | 0.1296         | 1                        | 0                    |
| Tumor Thickness ≥ 6 mm           | 2.0 (1.0 - 4.0)            | 0.0503         | 2                        | 0                    |
| Podoplanin expression            | 1.9 (0.6 - 5.6)            | 0.2595         | 1                        | 0                    |
| Lymphovascular Invasion          | 1.9 (1.0 - 3.6)            | 0.0673         | 2                        | 0                    |
| Age > 80                         | 1.8 (1.2 - 2.9)            | 0.0110         | 1                        | 0                    |
| Tumor Size ≥ 2 cm                | 1.8 (1.3 - 2.6)            | 0.0006         | 4                        | 0                    |
| Age > 70                         | 1.8 (1.2 - 2.7)            | 0.0045         | 1                        | 0                    |
| Perineural invasion              | 1.8 (1.4 - 2.3)            | <0.0001        | 7                        | 1.81                 |
| Poor Differentiation             | 1.6 (1.1 - 2.4)            | 0.0231         | 5                        | 5.91                 |
| Male Sex                         | 1.5 (1.0 - 2.3)            | 0.0443         | 4                        | 0                    |
| Location on Lip                  | 1.5 (0.8 - 2.7)            | 0.2193         | 3                        | 0                    |
| Location on Ear                  | 1.3 (1.1 - 1.6)            | 0.0006         | 3                        | 8                    |
| Age > 78                         | 1.1 (1.0 - 1.1)            | 0.0500         | 1                        | 0                    |
| Location on Scalp                | 1.0 (1.0 - 1.1)            | 0.4104         | 1                        | 0                    |
| Invasion Beyond Subcutaneous Fat | 1.0 (0.1 - 12.4)           | 0.9906         | 2                        | 0                    |
| Cortactin                        | 0.9 (0.6 - 1.5)            | 0.7420         | 1                        | 0                    |
| FAK expression                   | 0.7 (0.5 - 1.2)            | 0.2145         | 1                        | 0                    |
| Solid Organ Transplant           | 0.6 (0.3 - 1.5)            | 0.2920         | 1                        | 0                    |

| <b>Locoregional recurrence</b> |                            |                |                          |                      |
|--------------------------------|----------------------------|----------------|--------------------------|----------------------|
| <i>Risk Factor</i>             | <i>Risk ratio (95% CI)</i> | <i>p-value</i> | <i>Number of Studies</i> | <i>I<sup>2</sup></i> |
| Lymphovascular Invasion        | 3.3 (0.8 - 13.0)           | 0.0945         | 3                        | 14.8                 |
| Immunosuppression              | 2.9 (2.0 - 4.2)            | <0.0001        | 4                        | 0                    |
| Poor Differentiation           | 2.6 (1.7 - 4.0)            | <0.0001        | 3                        | 0                    |
| Perineural invasion            | 1.5 (0.8 - 3.1)            | 0.2314         | 4                        | 46.3                 |
| Smoker                         | 1.0 (0.2 - 4.4)            | 0.9826         | 1                        | 0                    |

| <b>Local recurrence, nodal metastasis, or distal metastasis</b> |                            |                |                          |                      |
|-----------------------------------------------------------------|----------------------------|----------------|--------------------------|----------------------|
| <i>Risk Factor</i>                                              | <i>Risk ratio (95% CI)</i> | <i>p-value</i> | <i>Number of Studies</i> | <i>I<sup>2</sup></i> |
| Perineural invasion                                             | 6.5 (2.0 - 20.9)           | 0.0016         | 2                        | 0                    |
| Invasion Beyond Subcutaneous Fat                                | 4.7 (2.5 - 8.8)            | <0.0001        | 1                        | 0                    |
| Immunosuppression                                               | 2.2 (0.4 - 13.2)           | 0.3757         | 2                        | 0                    |
| Tumor Budding                                                   | 2.2 (1.1 - 4.1)            | 0.0205         | 1                        | 0                    |
| Location on Ear                                                 | 1.4 (0.1 - 14.9)           | 0.7600         | 1                        | 0                    |
| Location on Lip                                                 | 1.4 (0.5 - 3.9)            | 0.4700         | 1                        | 0                    |
| Age > 70                                                        | 1.3 (0.5 - 3.6)            | 0.6400         | 1                        | 0                    |
| tumor size ≥ 4 cm                                               | 1.2 (0.6 - 2.4)            | 0.5100         | 1                        | 0                    |
| Poor Differentiation                                            | 1.2 (0.7 - 2.1)            | 0.4900         | 1                        | 0                    |
| Tumor Thickness ≥ 2 mm                                          | 1.0 (0.5 - 1.9)            | 0.9500         | 1                        | 0                    |
| Female sex                                                      | 1.0 (0.9 - 1.0)            | 0.2200         | 1                        | 0                    |
| Tumor Size ≥ 2 cm                                               | 0.5 (0.4 - 0.8)            | 0.0007         | 1                        | 0                    |

| <b>Local recurrence, nodal metastasis, or disease specific death</b> |                            |                |                          |                      |
|----------------------------------------------------------------------|----------------------------|----------------|--------------------------|----------------------|
| <i>Risk Factor</i>                                                   | <i>Risk ratio (95% CI)</i> | <i>p-value</i> | <i>Number of Studies</i> | <i>I<sup>2</sup></i> |
| Perineural invasion                                                  | 6.7 (3.2 - 14.3)           | <0.0001        | 1                        | 0                    |
| Poor Differentiation                                                 | 4.3 (2.2 - 8.4)            | <0.0001        | 2                        | 0                    |
| Location on Ear or Lip                                               | 2.8 (1.0 - 7.5)            | 0.0456         | 1                        | 0                    |

|                                  |                  |               |   |   |
|----------------------------------|------------------|---------------|---|---|
| Immunosuppression                | 2.7 (0.7 - 10.1) | 0.1385        | 2 | 0 |
| Tumor Thickness $\geq$ 6 mm      | 2.6 (1.3 - 5.3)  | <b>0.0090</b> | 1 | 0 |
| Invasion Beyond Subcutaneous Fat | 2.2 (0.9 - 5.6)  | 0.0954        | 1 | 0 |
| Male Sex                         | 2.1 (0.6 - 7.3)  | 0.2249        | 1 | 0 |
| Tumor Size $\geq$ 2 cm           | 0.8 (0.1 - 10.2) | 0.8724        | 2 | 0 |
| Tumor Size $\geq$ 4 cm           | 0.5 (0.1 - 3.7)  | 0.5072        | 1 | 0 |

eTable 3. Incidence proportion for each risk factor modality per outcome across all studies

| <b>Risk Factor</b>                 | <b>Outcome</b>          | <b>Total N</b> | <b>Incidence Rate</b> | <b>Lower 95% Confidence Inteval</b> | <b>Upper 95% Confidence Inteval</b> | <b>I<sup>2</sup></b> | <b>Number of Studies</b> |
|------------------------------------|-------------------------|----------------|-----------------------|-------------------------------------|-------------------------------------|----------------------|--------------------------|
| <i>Local recurrence</i>            |                         |                |                       |                                     |                                     |                      |                          |
| Tumor Thickness > 8 mm             | <i>Local Recurrence</i> | 8              | 0.250                 | 0.063                               | 0.623                               | 0.0                  | 1                        |
| Desmoplasia                        | <i>Local Recurrence</i> | 381            | 0.197                 | 0.068                               | 0.450                               | 0.0                  | 3                        |
| Perineural Invasion                | <i>Local Recurrence</i> | 503            | 0.187                 | 0.132                               | 0.259                               | 0.0                  | 12                       |
| Invasion beyond subcutaneous fat   | <i>Local Recurrence</i> | 89             | 0.182                 | 0.019                               | 0.723                               | 0.0                  | 2                        |
| Lymphovascular Invasion            | <i>Local Recurrence</i> | 28             | 0.170                 | 0.078                               | 0.333                               | 0.0                  | 4                        |
| Growth Rate > 4 mm/month           | <i>Local Recurrence</i> | 37             | 0.162                 | 0.075                               | 0.317                               | 0.0                  | 1                        |
| Location on Ear                    | <i>Local Recurrence</i> | 357            | 0.140                 | 0.074                               | 0.249                               | 0.0                  | 5                        |
| Ulceration                         | <i>Local Recurrence</i> | 19             | 0.111                 | 0.072                               | 0.167                               | 26.5                 | 3                        |
| HIV                                | <i>Local Recurrence</i> | 9              | 0.111                 | 0.015                               | 0.500                               | 0.0                  | 1                        |
| CLL                                | <i>Local Recurrence</i> | 341            | 0.098                 | 0.053                               | 0.175                               | 0.0                  | 3                        |
| Age > 75                           | <i>Local Recurrence</i> | 356            | 0.084                 | 0.060                               | 0.118                               | 0.0                  | 1                        |
| Solid Organ Transplant             | <i>Local Recurrence</i> | 1764           | 0.084                 | 0.028                               | 0.223                               | 13.3                 | 5                        |
| Poor Differentiation               | <i>Local Recurrence</i> | 700            | 0.083                 | 0.046                               | 0.145                               | 16.8                 | 8                        |
| Location on Scalp                  | <i>Local Recurrence</i> | 431            | 0.075                 | 0.049                               | 0.113                               | 48.1                 | 4                        |
| Location on Lip                    | <i>Local Recurrence</i> | 376            | 0.068                 | 0.046                               | 0.098                               | 0.0                  | 4                        |
| Immunosuppression                  | <i>Local Recurrence</i> | 1470           | 0.067                 | 0.037                               | 0.117                               | 15.3                 | 10                       |
| Hematologic Malignancy             | <i>Local Recurrence</i> | 446            | 0.063                 | 0.044                               | 0.089                               | 0.0                  | 1                        |
| Tumor Size > 2 cm                  | <i>Local Recurrence</i> | 1327           | 0.057                 | 0.016                               | 0.185                               | 4.0                  | 4                        |
| Non-Hodgkins Lymphoma              | <i>Local Recurrence</i> | 608            | 0.056                 | 0.029                               | 0.103                               | 0.0                  | 2                        |
| Male Sex                           | <i>Local Recurrence</i> | 1466           | 0.055                 | 0.037                               | 0.081                               | 0.0                  | 6                        |
| Location on Head and Neck          | <i>Local Recurrence</i> | 1195           | 0.054                 | 0.032                               | 0.091                               | 0.0                  | 3                        |
| Tumor Size > 5 cm                  | <i>Local Recurrence</i> | 40             | 0.050                 | 0.013                               | 0.179                               | 7.5                  | 1                        |
| Tumor Thickness > 2 mm             | <i>Local Recurrence</i> | 277            | 0.047                 | 0.016                               | 0.128                               | 0.0                  | 2                        |
| Age > 60                           | <i>Local Recurrence</i> | 856            | 0.045                 | 0.023                               | 0.089                               | 0.0                  | 2                        |
| Tumor Thickness > 4 mm             | <i>Local Recurrence</i> | 112            | 0.045                 | 0.019                               | 0.103                               | 0.0                  | 1                        |
| Age > 70                           | <i>Local Recurrence</i> | 655            | 0.035                 | 0.023                               | 0.052                               | 0.0                  | 1                        |
| Age > 80                           | <i>Local Recurrence</i> | 417            | 0.031                 | 0.018                               | 0.053                               | 0.0                  | 1                        |
| Location on Ear or Lip             | <i>Local Recurrence</i> | 108            | 0.028                 | 0.009                               | 0.083                               | 0.0                  | 1                        |
| Age > 65                           | <i>Local Recurrence</i> | 1049.02        | 0.017                 | 0.011                               | 0.027                               | 0.0                  | 1                        |
| Acantholytic Subtype               | <i>Local Recurrence</i> | 103            | 0.010                 | 0.001                               | 0.066                               | 0.0                  | 1                        |
| <i>Nodal Metastasis</i>            |                         |                |                       |                                     |                                     |                      |                          |
| Perineural or vascular involvement | <i>Nodal Metastasis</i> | 25             | 0.544                 | 0.085                               | 0.939                               | 12.4                 | 3                        |



|                                  |                         |      |       |       |       |      |    |
|----------------------------------|-------------------------|------|-------|-------|-------|------|----|
| Podoplanin                       | <i>Nodal Metastasis</i> | 23   | 0.522 | 0.325 | 0.712 | 0.0  | 1  |
| HER-3 Positive                   | <i>Nodal Metastasis</i> | 48   | 0.500 | 0.362 | 0.638 | 0.0  | 1  |
| Lymphovascular Invasion          | <i>Nodal Metastasis</i> | 71   | 0.445 | 0.244 | 0.665 | 24.1 | 6  |
| EGFR-positive                    | <i>Nodal Metastasis</i> | 47   | 0.401 | 0.162 | 0.698 | 0.0  | 2  |
| Membrane E-cadherin              | <i>Nodal Metastasis</i> | 26   | 0.385 | 0.221 | 0.579 | 0.0  | 1  |
| Cytoplasm E-Cadherin             | <i>Nodal Metastasis</i> | 16   | 0.375 | 0.179 | 0.623 | 0.0  | 1  |
| HER-4 Positive                   | <i>Nodal Metastasis</i> | 26   | 0.346 | 0.191 | 0.543 | 0.0  | 1  |
| Tumor Thickness > 8 mm           | <i>Nodal Metastasis</i> | 28   | 0.325 | 0.071 | 0.753 | 0.0  | 2  |
| Tumor Budding                    | <i>Nodal Metastasis</i> | 51   | 0.275 | 0.170 | 0.412 | 0.0  | 1  |
| Growth Rate > 4 mm/month         | <i>Nodal Metastasis</i> | 37   | 0.243 | 0.132 | 0.405 | 0.0  | 1  |
| CLL                              | <i>Nodal Metastasis</i> | 57   | 0.240 | 0.083 | 0.524 | 0.0  | 2  |
| Diabetes                         | <i>Nodal Metastasis</i> | 9    | 0.222 | 0.056 | 0.579 | 0.0  | 1  |
| Cytokeratin 19 expression        | <i>Nodal Metastasis</i> | 42   | 0.214 | 0.115 | 0.363 | 0.0  | 1  |
| Tumor Thickness > 5 mm           | <i>Nodal Metastasis</i> | 52   | 0.212 | 0.121 | 0.343 | 0.0  | 1  |
| Tumor Thickness > 4 mm           | <i>Nodal Metastasis</i> | 68   | 0.206 | 0.126 | 0.318 | 0.0  | 1  |
| Hematologic Malignancy           | <i>Nodal Metastasis</i> | 5    | 0.200 | 0.027 | 0.691 | 0.0  | 1  |
| Poor Differentiation             | <i>Nodal Metastasis</i> | 719  | 0.184 | 0.120 | 0.272 | 1.7  | 11 |
| HIV                              | <i>Nodal Metastasis</i> | 2    | 0.167 | 0.010 | 0.806 | 0.0  | 1  |
| Desmoplasia                      | <i>Nodal Metastasis</i> | 145  | 0.166 | 0.113 | 0.235 | 0.0  | 1  |
| Invasion beyond subcutaneous fat | <i>Nodal Metastasis</i> | 90   | 0.163 | 0.028 | 0.565 | 2.9  | 4  |
| Perineural Invasion              | <i>Nodal Metastasis</i> | 641  | 0.152 | 0.107 | 0.212 | 0.0  | 16 |
| Tumor Size > 4 cm                | <i>Nodal Metastasis</i> | 7    | 0.143 | 0.020 | 0.581 | 0.0  | 1  |
| Location on Lip                  | <i>Nodal Metastasis</i> | 353  | 0.140 | 0.048 | 0.346 | 0.0  | 4  |
| Tumor Thickness > 3 mm           | <i>Nodal Metastasis</i> | 23   | 0.130 | 0.043 | 0.335 | 0.0  | 1  |
| Location on Ear                  | <i>Nodal Metastasis</i> | 373  | 0.117 | 0.071 | 0.188 | 13.5 | 5  |
| Male Sex                         | <i>Nodal Metastasis</i> | 945  | 0.100 | 0.034 | 0.260 | 5.2  | 5  |
| Age > 75                         | <i>Nodal Metastasis</i> | 356  | 0.093 | 0.067 | 0.128 | 0.0  | 1  |
| Tumor Size > 2 cm                | <i>Nodal Metastasis</i> | 1399 | 0.083 | 0.029 | 0.216 | 0.0  | 5  |
| Location on Scalp                | <i>Nodal Metastasis</i> | 413  | 0.077 | 0.054 | 0.110 | 0.0  | 5  |
| Age > 80                         | <i>Nodal Metastasis</i> | 87   | 0.069 | 0.031 | 0.145 | 0.0  | 1  |
| Immunosuppression                | <i>Nodal Metastasis</i> | 1452 | 0.062 | 0.023 | 0.158 | 33.3 | 9  |
| Location on Ear or Lip           | <i>Nodal Metastasis</i> | 108  | 0.056 | 0.025 | 0.118 | 0.0  | 1  |
| Solid Organ Transplant           | <i>Nodal Metastasis</i> | 579  | 0.049 | 0.018 | 0.122 | 24.2 | 5  |
| Ulceration                       | <i>Nodal Metastasis</i> | 99   | 0.040 | 0.015 | 0.103 | 0.0  | 1  |
| Location on Head and Neck        | <i>Nodal Metastasis</i> | 772  | 0.038 | 0.027 | 0.054 | 0.0  | 2  |
| Age > 65                         | <i>Nodal Metastasis</i> | 1067 | 0.024 | 0.017 | 0.036 | 0.0  | 1  |
| Acantholytic Subtype             | <i>Nodal Metastasis</i> | 103  | 0.010 | 0.001 | 0.066 | 0.0  | 1  |

---

*Distant Metastasis*

---

|                                  |                           |       |       |       |       |     |   |
|----------------------------------|---------------------------|-------|-------|-------|-------|-----|---|
| CLL                              | <i>Distant Metastasis</i> | 42    | 0.143 | 0.066 | 0.283 | 0.0 | 1 |
| Solid Organ Transplant           | <i>Distant Metastasis</i> | 16    | 0.125 | 0.031 | 0.386 | 0.0 | 1 |
| Tumor Thickness > 2 mm           | <i>Distant Metastasis</i> | 62    | 0.097 | 0.044 | 0.199 | 0.0 | 1 |
| Lymphovascular Invasion          | <i>Distant Metastasis</i> | 12    | 0.083 | 0.012 | 0.413 | 0.0 | 1 |
| Poor Differentiation             | <i>Distant Metastasis</i> | 286   | 0.073 | 0.005 | 0.565 | 0.0 | 2 |
| Location on Head and Neck        | <i>Distant Metastasis</i> | 185   | 0.070 | 0.041 | 0.117 | 0.0 | 1 |
| Ulceration                       | <i>Distant Metastasis</i> | 62    | 0.065 | 0.024 | 0.160 | 0.0 | 1 |
| Male Sex                         | <i>Distant Metastasis</i> | 117   | 0.060 | 0.029 | 0.120 | 0.0 | 1 |
| Perineural Invasion              | <i>Distant Metastasis</i> | 311   | 0.057 | 0.018 | 0.169 | 8.8 | 5 |
| Desmoplasia                      | <i>Distant Metastasis</i> | 145   | 0.041 | 0.019 | 0.089 | 0.0 | 1 |
| Invasion beyond subcutaneous fat | <i>Distant Metastasis</i> | 29    | 0.034 | 0.005 | 0.208 | 0.0 | 1 |
| Immunosuppression                | <i>Distant Metastasis</i> | 469   | 0.034 | 0.003 | 0.308 | 0.0 | 2 |
| Tumor Size > 2 cm                | <i>Distant Metastasis</i> | 1078  | 0.026 | 0.001 | 0.340 | 0.0 | 1 |
| Location on Ear or Lip           | <i>Distant Metastasis</i> | 108   | 0.019 | 0.005 | 0.071 | 0.0 | 1 |
| Age > 75                         | <i>Distant Metastasis</i> | 356   | 0.017 | 0.008 | 0.037 | 0.0 | 1 |
| Age > 65                         | <i>Distant Metastasis</i> | 1067  | 0.011 | 0.006 | 0.020 | 0.0 | 1 |
| <i>Any Metastasis</i>            |                           |       |       |       |       |     |   |
| 40-GEP high risk                 | <i>Any Metastasis</i>     | 24    | 0.625 | 0.422 | 0.792 | 0.0 | 1 |
| Invasion beyond subcutaneous fat | <i>Any Metastasis</i>     | 14    | 0.286 | 0.111 | 0.561 | 0.0 | 1 |
| 40-GEP intermediate risk         | <i>Any Metastasis</i>     | 87    | 0.207 | 0.134 | 0.305 | 0.0 | 1 |
| Perineural Invasion              | <i>Any Metastasis</i>     | 142   | 0.206 | 0.127 | 0.316 | 0.0 | 2 |
| Poor Differentiation             | <i>Any Metastasis</i>     | 338   | 0.138 | 0.051 | 0.321 | 0.0 | 5 |
| Location on Ear                  | <i>Any Metastasis</i>     | 9363  | 0.102 | 0.031 | 0.286 | 0.0 | 5 |
| Immunosuppression                | <i>Any Metastasis</i>     | 150   | 0.084 | 0.033 | 0.197 | 0.0 | 3 |
| Location on Ear or Lip           | <i>Any Metastasis</i>     | 83    | 0.072 | 0.033 | 0.152 | 0.0 | 1 |
| Age > 60                         | <i>Any Metastasis</i>     | 739   | 0.060 | 0.045 | 0.079 | 0.0 | 1 |
| Tumor Thickness > 4 mm           | <i>Any Metastasis</i>     | 103   | 0.058 | 0.026 | 0.124 | 0.0 | 1 |
| Tumor Size > 2 cm                | <i>Any Metastasis</i>     | 130   | 0.054 | 0.026 | 0.109 | 0.0 | 1 |
| Age > 70                         | <i>Any Metastasis</i>     | 655   | 0.053 | 0.039 | 0.074 | 0.0 | 1 |
| Male Sex                         | <i>Any Metastasis</i>     | 61637 | 0.050 | 0.017 | 0.137 | 0.0 | 5 |
| Ulceration                       | <i>Any Metastasis</i>     | 69    | 0.043 | 0.014 | 0.126 | 0.0 | 1 |
| Tumor Thickness > 2 mm           | <i>Any Metastasis</i>     | 415   | 0.043 | 0.027 | 0.068 | 0.0 | 1 |
| Desmoplasia                      | <i>Any Metastasis</i>     | 177   | 0.040 | 0.019 | 0.081 | 0.0 | 1 |
| Solid Organ Transplant           | <i>Any Metastasis</i>     | 1496  | 0.039 | 0.017 | 0.090 | 0.0 | 3 |
| Location on Scalp                | <i>Any Metastasis</i>     | 15843 | 0.037 | 0.011 | 0.112 | 0.0 | 3 |
| Location on Lip                  | <i>Any Metastasis</i>     | 1722  | 0.034 | 0.014 | 0.078 | 0.0 | 3 |
| Non-Hodgkins Lymphoma            | <i>Any Metastasis</i>     | 134   | 0.030 | 0.011 | 0.077 | 0.0 | 1 |
| Location on Head and Neck        | <i>Any Metastasis</i>     | 765   | 0.026 | 0.017 | 0.040 | 0.0 | 1 |

|                                  |                               |       |       |       |       |      |   |
|----------------------------------|-------------------------------|-------|-------|-------|-------|------|---|
| Age > 80                         | <i>Any Metastasis</i>         | 47583 | 0.026 | 0.006 | 0.109 | 0.0  | 2 |
| Age > 90                         | <i>Any Metastasis</i>         | 11393 | 0.011 | 0.009 | 0.013 | 0.0  | 1 |
| <i>Disease Specific Death</i>    |                               |       |       |       |       |      |   |
| Lymphovascular Invasion          | <i>Disease Specific Death</i> | 12    | 0.333 | 0.131 | 0.624 | 0.0  | 1 |
| Invasion beyond subcutaneous fat | <i>Disease Specific Death</i> | 78    | 0.263 | 0.148 | 0.424 | 0.0  | 3 |
| Tumor diameter > 50 mm           | <i>Disease Specific Death</i> | 83    | 0.157 | 0.093 | 0.251 | 0.0  | 1 |
| Desmoplasia                      | <i>Disease Specific Death</i> | 214   | 0.142 | 0.056 | 0.315 | 44.2 | 2 |
| CLL                              | <i>Disease Specific Death</i> | 65    | 0.128 | 0.006 | 0.772 | 0.0  | 2 |
| Poor Differentiation             | <i>Disease Specific Death</i> | 720   | 0.096 | 0.037 | 0.229 | 24.0 | 5 |
| Perineural Invasion              | <i>Disease Specific Death</i> | 394   | 0.095 | 0.063 | 0.141 | 0.0  | 6 |
| Tumor thickness > 6 mm           | <i>Disease Specific Death</i> | 318   | 0.082 | 0.056 | 0.117 | 0.0  | 1 |
| Location on Ear                  | <i>Disease Specific Death</i> | 318   | 0.058 | 0.016 | 0.193 | 0.0  | 2 |
| Location on Lip                  | <i>Disease Specific Death</i> | 389   | 0.043 | 0.020 | 0.091 | 0.0  | 1 |
| Immunosuppression                | <i>Disease Specific Death</i> | 1094  | 0.037 | 0.009 | 0.137 | 14.0 | 6 |
| Solid Organ Transplant           | <i>Disease Specific Death</i> | 288   | 0.030 | 0.011 | 0.078 | 0.0  | 3 |
| Tumor Size > 2 cm                | <i>Disease Specific Death</i> | 1237  | 0.028 | 0.008 | 0.090 | 0.0  | 2 |
| Male Sex                         | <i>Disease Specific Death</i> | 765   | 0.022 | 0.009 | 0.054 | 0.0  | 1 |
| Location on Head and Neck        | <i>Disease Specific Death</i> | 680   | 0.019 | 0.011 | 0.033 | 0.0  | 1 |
| Location on Ear or Lip           | <i>Disease Specific Death</i> | 108   | 0.019 | 0.005 | 0.071 | 0.0  | 1 |
| Age > 65                         | <i>Disease Specific Death</i> | 1067  | 0.017 | 0.011 | 0.027 | 0.0  | 1 |
| <i>All-Cause Mortality</i>       |                               |       |       |       |       |      |   |
| CLL                              | <i>All Cause Death</i>        | 42    | 0.881 | 0.744 | 0.950 | 0.0  | 1 |
| Poor Differentiation             | <i>All Cause Death</i>        | 19    | 0.737 | 0.502 | 0.886 | 0.0  | 1 |
| Immunosuppression                | <i>All Cause Death</i>        | 173   | 0.473 | 0.152 | 0.817 | 14.9 | 3 |
| Perineural Invasion              | <i>All Cause Death</i>        | 48    | 0.333 | 0.215 | 0.477 | 0.0  | 1 |
| Location on Lip                  | <i>All Cause Death</i>        | 297   | 0.300 | 0.250 | 0.354 | 0.0  | 1 |
| Solid Organ Transplant           | <i>All Cause Death</i>        | 347   | 0.187 | 0.139 | 0.246 | 0.0  | 2 |
| Location on Ear                  | <i>All Cause Death</i>        | 112   | 0.170 | 0.111 | 0.251 | 0.0  | 1 |
| <i>Locoregional Recurrence</i>   |                               |       |       |       |       |      |   |

|                                                                   |                                                                                                  |     |       |       |       |      |   |
|-------------------------------------------------------------------|--------------------------------------------------------------------------------------------------|-----|-------|-------|-------|------|---|
| Lymphovascular Invasion                                           | <i>Locoregional recurrence</i>                                                                   | 10  | 0.305 | 0.099 | 0.637 | 0.0  | 2 |
| Immunosuppression                                                 | <i>Locoregional recurrence</i>                                                                   | 113 | 0.242 | 0.078 | 0.547 | 37.0 | 3 |
| Perineural Invasion                                               | <i>Locoregional recurrence</i>                                                                   | 50  | 0.201 | 0.112 | 0.336 | 0.0  | 2 |
| Location on Lip                                                   | <i>Locoregional recurrence</i>                                                                   | 297 | 0.111 | 0.080 | 0.152 | 0.0  | 1 |
| Male Sex                                                          | <i>Locoregional recurrence</i>                                                                   | 168 | 0.042 | 0.020 | 0.085 | 0.0  | 1 |
| Smoker                                                            | <i>Locoregional recurrence</i>                                                                   | 101 | 0.040 | 0.015 | 0.101 | 0.0  | 1 |
| <i>Local Recurrence OR Nodal Metastasis OR Distant Metastasis</i> |                                                                                                  |     |       |       |       |      |   |
| Perineural Invasion                                               | Local Recurrence OR<br>Nodal Metastasis OR<br>Distant Metastasis                                 | 32  | 0.219 | 0.108 | 0.393 | 0    | 1 |
| <i>Local Recurrence OR Nodal Metastasis OR Distant Metastasis</i> |                                                                                                  |     |       |       |       |      |   |
| Poor Differentiation                                              | Local recurrence OR<br>Nodal Metastasis OR<br>Distant Metastasis OR<br>Disease Specific<br>Death | 29  | 0.172 | 0.074 | 0.353 | 0.0  | 1 |
| Invasion beyond subcutaneous fat                                  | Local recurrence OR<br>Nodal Metastasis OR<br>Distant Metastasis OR<br>Disease Specific<br>Death | 1   | 0.167 | 0.010 | 0.806 | 0.0  | 1 |
| Immunosuppression                                                 | Local recurrence OR<br>Nodal Metastasis OR<br>Distant Metastasis OR<br>Disease Specific<br>Death | 550 | 0.159 | 0.062 | 0.352 | 39.0 | 3 |
| Perineural Invasion                                               | Local recurrence OR<br>Nodal Metastasis OR<br>Distant Metastasis OR<br>Disease Specific<br>Death | 6   | 0.071 | 0.004 | 0.577 | 0.0  | 1 |
| Tumor Size > 2 cm                                                 | Local recurrence OR<br>Nodal Metastasis OR<br>Distant Metastasis OR<br>Disease Specific<br>Death | 335 | 0.036 | 0.020 | 0.062 | 0.0  | 1 |
| Tumor Size > 4 cm                                                 | Local recurrence OR<br>Nodal Metastasis OR<br>Distant Metastasis OR<br>Disease Specific<br>Death | 40  | 0.025 | 0.004 | 0.157 | 0.0  | 1 |

eTable 4. Incidence proportion for each treatment modality per outcome across all studies

| Treatment                                                          | Outcome                   | Total N | Event Rate | Lower 95% Confidence Interval | Upper 95% Confidence Interval | I <sup>2</sup> | Number of Studies |
|--------------------------------------------------------------------|---------------------------|---------|------------|-------------------------------|-------------------------------|----------------|-------------------|
| <i>Local recurrence</i>                                            |                           |         |            |                               |                               |                |                   |
| Standard Excision                                                  | <i>Local Recurrence</i>   | 1925    | 0.055      | 0.032                         | 0.092                         | 0              | 9                 |
| Mohs Micrographic Surgery                                          | <i>Local Recurrence</i>   | 4585    | 0.026      | 0.018                         | 0.039                         | 5.267          | 12                |
| AFL-PDT                                                            | <i>Local Recurrence</i>   | 19      | 0.105      | 0.026                         | 0.337                         | 0              | 1                 |
| MAL-PDT                                                            | <i>Local Recurrence</i>   | 21      | 0.619      | 0.402                         | 0.797                         | 0              | 1                 |
| Excision with Whole Section Intraoperative Frozen Section Analysis | <i>Local Recurrence</i>   | 131     | 0.046      | 0.021                         | 0.098                         | 0              | 1                 |
| Radiotherapy                                                       | <i>Local Recurrence</i>   | 329     | 0.091      | 0.049                         | 0.163                         | 0              | 6                 |
| Cryosurgery                                                        | <i>Local Recurrence</i>   | 66      | 0.076      | 0.027                         | 0.194                         | 0              | 2                 |
| All Non-MMS Modalities                                             | <i>Local Recurrence</i>   | 2491    | 0.81       | 0.069                         | 0.094                         | 83.157         | 20                |
| <i>Nodal Metastasis</i>                                            |                           |         |            |                               |                               |                |                   |
| Standard Excision                                                  | <i>Nodal Metastasis</i>   | 1299    | 0.035      | 0.01                          | 0.12                          | 0              | 6                 |
| Mohs Micrographic Surgery                                          | <i>Nodal Metastasis</i>   | 2409    | 0.016      | 0.06                          | 0.038                         | 0              | 5                 |
| Excision with Whole Section Intraoperative Frozen Section Analysis | <i>Nodal Metastasis</i>   | 131     | 0.015      | 0.004                         | 0.059                         | 0              | 1                 |
| Radiotherapy                                                       | <i>Nodal Metastasis</i>   | 17      | 0.176      | 0.058                         | 0.427                         | 0              | 1                 |
| All Non-MMS Modalities                                             | <i>Nodal Metastasis</i>   | 1316    | 0.04       | 0.013                         | 0.111                         | 0              | 7                 |
| <i>Distant Metastasis</i>                                          |                           |         |            |                               |                               |                |                   |
| Standard Excision                                                  | <i>Distant Metastasis</i> | 969     | 0.015      | 0.003                         | 0.087                         | 41.773         | 4                 |
| Mohs Micrographic Surgery                                          | <i>Distant Metastasis</i> | 2646    | 0.013      | 0.004                         | 0.037                         | 0              | 6                 |
| <i>Any Metastasis</i>                                              |                           |         |            |                               |                               |                |                   |

|                                                   |                                   |      |       |       |       |       |   |
|---------------------------------------------------|-----------------------------------|------|-------|-------|-------|-------|---|
| Standard Excision<br>Mohs Micrographic<br>Surgery | <i>Any Metastasis</i>             | 681  | 0.046 | 0.01  | 0.19  | 0     | 5 |
| Radiotherapy                                      | <i>Any Metastasis</i>             | 3    | 0.333 | 0.043 | 0.846 | 0     | 1 |
| All Non-MMS Modalities                            | <i>Any Metastasis</i>             | 815  | 0.394 | 0.048 | 0.011 | 0.189 | 5 |
| <i>Disease Specific Death</i>                     |                                   |      |       |       |       |       |   |
| Standard Excision<br>Mohs Micrographic<br>Surgery | <i>Disease Specific<br/>Death</i> | 814  | 0.014 | 0.007 | 0.025 | 0     | 3 |
| Radiotherapy                                      | <i>Disease Specific<br/>Death</i> | 34   | 0.382 | 0.237 | 0.553 | 0     | 1 |
| All Non-MMS Modalities                            | <i>Disease Specific<br/>Death</i> | 848  | 0.041 | 0.004 | 0.321 | 0     | 4 |
| <i>All Cause Mortality</i>                        |                                   |      |       |       |       |       |   |
| Standard Excision<br>Mohs Micrographic<br>Surgery | <i>All Cause Death</i>            | 447  | 0.359 | 0.087 | 0.767 | 0     | 2 |
|                                                   | <i>All Cause Death</i>            | 1066 | 0.16  | 0.09  | 0.269 | 0     | 2 |

eFigure 1. Forest plots of results of random effects analysis: risk ratio for each risk factor-and distant metastasis, any metastasis, and all-cause death identified in more than 1 study

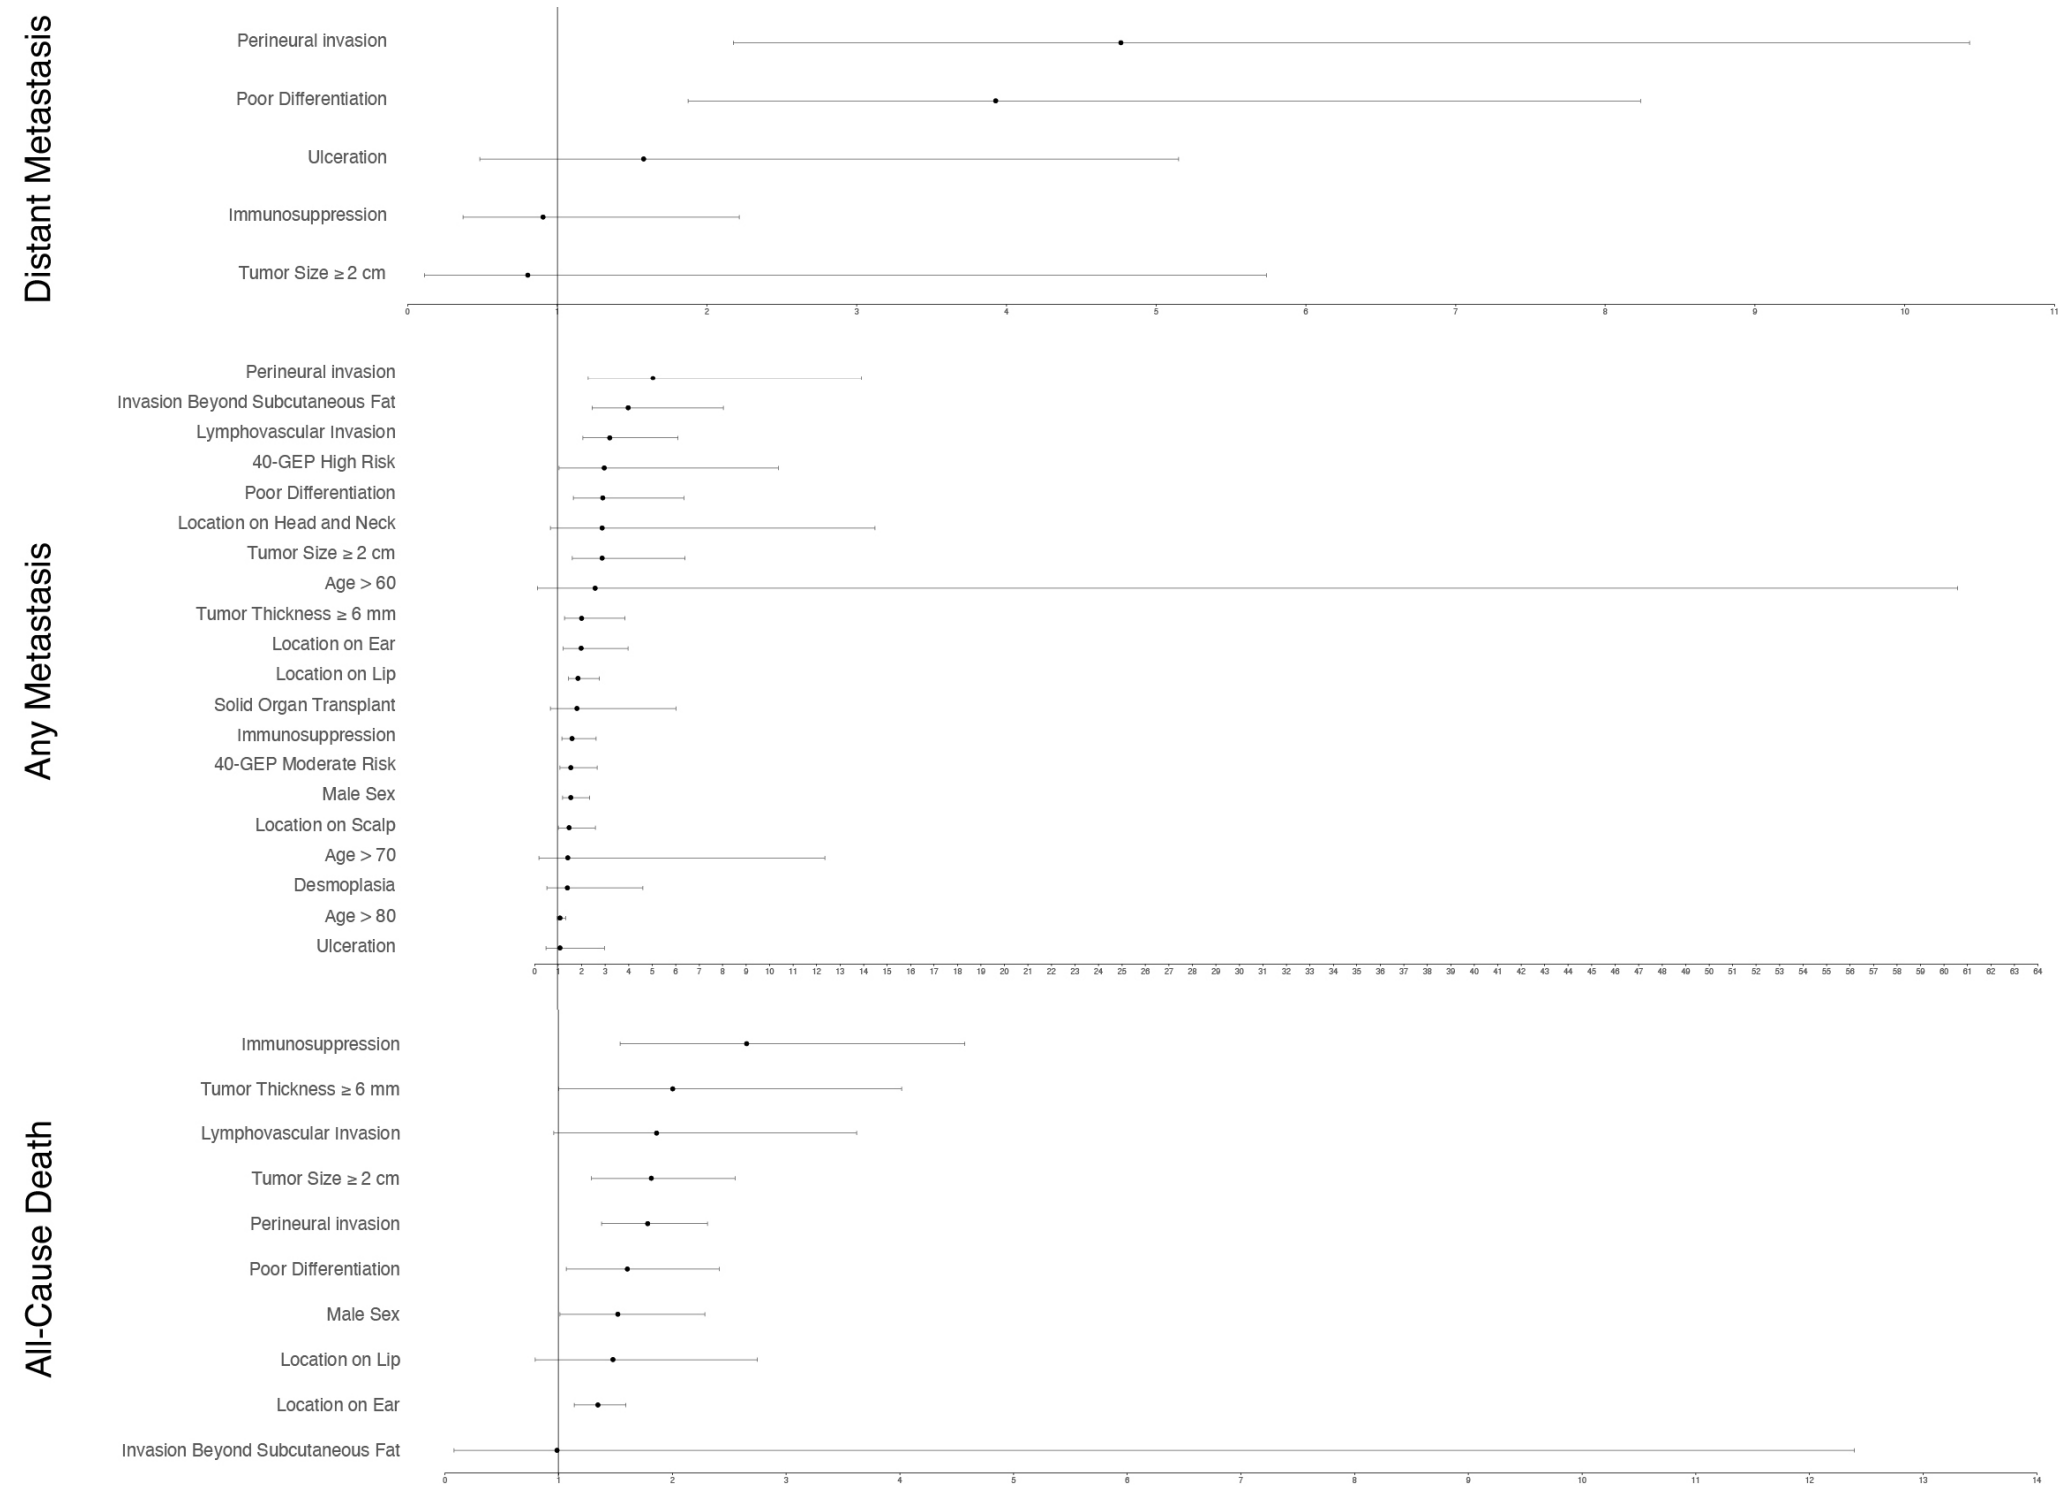

## References

1. Alam M, Brown RN, Silber DH, Mullen GM, Feldman DS, Oren RM, et al. Increased incidence and mortality associated with skin cancers after cardiac transplant. *American Journal of Transplantation*. 2011;11(7):1488-97.
2. Baker NJ, Webb AA, Macpherson D. Surgical management of cutaneous squamous cell carcinoma of the head and neck. *Br J Oral Maxillofac Surg*. 2001;39(2):87-90.
3. Breuninger H, Brantsch K, Eigentler T, Hafner HM. Comparison and evaluation of the current staging of cutaneous carcinomas. [German, English]. *JDDG - Journal of the German Society of Dermatology*. 2012;10(8):579-86.
4. Brinkman JN, Hajder E, Van Der Holt B, Den Bakker MA, Hovius SER, Mureau MAM. The effect of differentiation grade of cutaneous squamous cell carcinoma on excision margins, local recurrence, metastasis, and patient survival: A retrospective follow-up study. *Annals of Plastic Surgery*. 2015;75(3):323-6.
5. Brougham NDLS, Dennett ER, Cameron R, Tan ST. The incidence of metastasis from cutaneous squamous cell carcinoma and the impact of its risk factors. *Journal of Surgical Oncology*. 2012;106(7):811-5.
6. Conde-Ferreirós A, Corchete LA, Jaka A, Santos-Briz Á, Fuente MJ, Posada R, et al. Patterns of incidental perineural invasion and prognosis in cutaneous squamous cell carcinoma: A multicenter, retrospective cohort study. *Journal of the American Academy of Dermatology*. 2021;84(6):1708-12.
7. Demirdover C, Geyik A, Vayvada H, Yilmaz M. The accuracy of sentinel lymph node positivity in patients with cutaneous squamous cell carcinoma. *Acta Medica Mediterranea*. 2020;36(6):3345-9.
8. Dimonitsas E, Champsas G, Kakagia D, Stavrianos S, Roussos S, Doryforou O, et al. Tracking the risk factors associated with high-risk cSCC: A 10-year, Two-Institution, Greek study. *J buon*. 2021;26(3):1148-58.
9. Dormand EL, Ridha H, Vesely MJ. Long-term outcome of squamous cell carcinoma of the upper and lower limbs. *J Plast Reconstr Aesthet Surg*. 2010;63(10):1705-11.
10. Duran J, Morgan FC, Karia PS, Schmults CD. An evaluation of high-stage cutaneous squamous cell carcinoma outcomes by sex. *British Journal of Dermatology*. 2017;177(4):1131-3.
11. Eigentler TK, Leiter U, Häfner HM, Garbe C, Röcken M, Breuninger H. Survival of Patients with Cutaneous Squamous Cell Carcinoma: Results of a Prospective Cohort Study. *J Invest Dermatol*. 2017;137(11):2309-15.
12. Fujimoto M, Yamamoto Y, Matsuzaki I, Warigaya K, Iwahashi Y, Kojima F, et al. Tumor budding is an independent risk factor for lymph node metastasis in cutaneous squamous cell carcinoma: a single center retrospective study. *J Cutan Pathol*. 2016;43(9):766-71.
13. Genders RE, Osinga JAJ, Tromp EE, O'Rourke P, Bouwes Bavinck JN, Plasmeijer EI. Metastasis risk of cutaneous squamous cell carcinoma in organ transplant recipients and immunocompetent patients. *Acta Dermato-Venereologica*. 2018;98(6):551-5.
14. Gonzalez JL, Cunningham K, Silverman R, Madan E, Nguyen BM. Comparison of the American Joint Committee on Cancer Seventh Edition and Brigham and Women's Hospital Cutaneous Squamous Cell Carcinoma Tumor Staging in Immunosuppressed Patients. *Dermatologic Surgery*. 2017;43(6):784-91.
15. Jansen P, Petri M, Merz SF, Brinker TJ, Schadendorf D, Stang A, et al. The prognostic value of sentinel lymph nodes on distant metastasis-free survival in patients with high-risk squamous cell carcinoma. *European Journal of Cancer*. 2019;111:107-15.
16. Kovatch KJ, Smith J, Birkeland AC, Hanks JE, McLean SA, Durham AB, et al. Institutional experience of treatment and outcomes for cutaneous periauricular squamous cell carcinoma. *Otolaryngology - Head and Neck Surgery (United States)*. 2018;159(1 Supplement 1):P89-P90.
17. Manyam B, Garsa AA, Chin RI, Reddy CA, Gastman B, Vidimos AT, et al. A multi-institutional comparison of outcomes of immunocompromised and immunocompetent patients treated with surgery and radiation therapy for cutaneous squamous cell carcinoma of the head and neck. *International Journal of Radiation Oncology Biology Physics*. 2016;94(4):948.
18. Manyam BV, Gastman B, Zhang AY, Reddy CA, Burkey BB, Scharpf J, et al. Inferior outcomes in immunosuppressed patients with high-risk cutaneous squamous cell carcinoma of the head and neck treated with surgery and radiation therapy. *J Am Acad Dermatol*. 2015;73(2):221-7.
19. Melo JC, Marques MEA, Vasconcelos L, Miot HA, Abbade LPF. Invasive head and neck cutaneous squamous cell carcinoma: Clinical and histopathological characteristics, frequency of local recurrence and metastasis. *Anais Brasileiros de Dermatologia*. 2014;89(4):562-8.



20. Ong CS, Keogh AM, Kossard S, Macdonald PS, Spratt PM. Skin cancer in Australian heart transplant recipients. *J Am Acad Dermatol.* 1999;40(1):27-34.
21. Roozeboom MH, Lohman BGPM, Westers-Attema A, Nelemans PJ, Botterweck AA, Van Marion AMW, et al. Clinical and histological prognostic factors for local recurrence and metastasis of cutaneous squamous cell carcinoma: Analysis of a defined population. *Nederlands Tijdschrift voor Dermatologie en Venereologie.* 2012;22(1):50.
22. Ross AS, Miller Whalen F, Elenitsas R, Xu X, Troxel AB, Schmults CD. Diameter of involved nerves predicts outcomes in cutaneous squamous cell carcinoma with perineural invasion: An investigator-blinded retrospective cohort study. *Dermatologic Surgery.* 2009;35(12):1859-66.
23. Salmon PJM, Hussain W, Geisse JK, Grekin RC, Mortimer NJ. Sclerosing squamous cell carcinoma of the skin, an underemphasized locally aggressive variant: A 20-year experience. *Dermatologic Surgery.* 2011;37(5):664-70.
24. Seddon A, Hock B, Miller A, Frei L, Pearson J, McKenzie J, et al. Cutaneous squamous cell carcinomas with markers of increased metastatic risk are associated with elevated numbers of neutrophils and/or granulocytic myeloid derived suppressor cells. *Journal of Dermatological Science.* 2016;83(2):124-30.
25. Shaw JHF. Predictors of outcome for cutaneous squamous cell cancer. *New Zealand Medical Journal.* 2015;128(1411):13-9.
26. Stevenson ML, Criscito MC, Wilken R, Doudican NA, Bain EE, 3rd, Parashar B, et al. Use of Adjuvant Radiotherapy in the Treatment of High-risk Cutaneous Squamous Cell Carcinoma With Perineural Invasion. *JAMA Dermatol.* 2020;156(8):918-21.
27. Tam S, Yao CMK, Amit M, Gajera M, Luo X, Treistman R, et al. Association of Immunosuppression with Outcomes of Patients with Cutaneous Squamous Cell Carcinoma of the Head and Neck. *JAMA Otolaryngology - Head and Neck Surgery.* 2020;146(2):128-35.
28. Terra JB, Gaster MB, Halmos GB, Roodenburg JL, van der Vegt B, Romeijn TR, et al. Local control of 151 head and neck cutaneous squamous cell carcinoma after radiotherapy: a retrospective study on efficacy and prognostic factors. *Clinical Otolaryngology.* 2017;42(4):851-5.
29. Thiem DGE, Scharr K, Pabst AM, Saka B, Kämmerer PW. Facial cutaneous squamous cell carcinoma — microscopic safety margins and their impact on developing local recurrences. *Journal of Cranio-Maxillofacial Surgery.* 2020;48(1):49-55.
30. Tomaszewski JM, Gavriel H, Link E, Boodhun S, Sizeland A, Corry J. Aggressive behaviour of cutaneous squamous cell carcinoma in patients with chronic lymphocytic leukemia. *Asia-Pacific Journal of Clinical Oncology.* 2012;3(3):301.
31. Vinicius DLV, Scapulatempo C, Perpetuo NM, Mohamed F, De Carvalho TS, De Oliveira ATT, et al. Prognostic and risk factors in patients with locally advanced cutaneous squamous cell carcinoma of the trunk and extremities. *Journal of Skin Cancer.* 2011;(no pagination).
32. Yung AE, Que MS, Lo S, Aggarwal S, Hong AM, Tin MM, et al. Validation of the American Joint Committee on Cancer Staging in Squamous Cell Carcinoma of the Vermilion Lip. *Annals of Surgical Oncology.* 2021;28(6):3092-9.
33. Amaral T, Osewold M, Presser D, Meiwes A, Garbe C, Leiter U. Advanced cutaneous squamous cell carcinoma: real world data of patient profiles and treatment patterns. *Journal of the European Academy of Dermatology and Venereology.* 2019;33(S8):44-51.
34. Arbab M, Margalit DN, Tishler RB, Rabinowitz G, Pashtan IM, Borgelt BB, et al. Outcomes following radiation for cutaneous squamous cell carcinoma of the head and neck: Associations between immune suppression and recurrence. *Head and Neck.* 2019;41(7):2111-5.
35. Arron ST, Wysong A, Hall MA, Bailey CN, Covington KR, Kurley SJ, et al. Gene expression profiling for metastatic risk in head and neck cutaneous squamous cell carcinoma. *Laryngoscope Investigative Otolaryngology.* 2022.
36. Blechman AB, Carucci JA, Stevenson ML. Stratification of Poor Outcomes for Cutaneous Squamous Cell Carcinoma in Immunosuppressed Patients Using the American Joint Committee on Cancer Eighth Edition and Brigham and Women's Hospital Staging Systems. *Dermatologic Surgery.* 2019;45(9):1117-24.
37. Bourlidou E, Vahtsevanos K, Kyrgidis A, Tilaveridis I, Patsatsi A, Andreadis D, et al. Risk factors for local recurrence of basal cell carcinoma and cutaneous squamous cell carcinoma of the middle third of the face: a 15-year retrospective analysis based on a single centre. *European Journal of Dermatology.* 2019;29(5):490-9.
38. Bovill ES, Banwell PE. Re-excision of incompletely excised cutaneous squamous cell carcinoma: Histological findings influence prognosis. *Journal of Plastic, Reconstructive and Aesthetic Surgery.* 2012;65(10):1390-5.

39. Brantsch KD, Meisner C, Schonfisch B, Trilling B, Wehner-Caroli J, Rocken M, et al. Analysis of risk factors determining prognosis of cutaneous squamous-cell carcinoma: a prospective study. *The Lancet Oncology*. 2008;9(8):713-20.
40. Brewer JD, Shanafelt TD, Khezri F, Sosa Seda IM, Zubair AS, Baum CL, et al. Increased incidence and recurrence rates of nonmelanoma skin cancer in patients with non-Hodgkin lymphoma: A Rochester epidemiology project population-based study in Minnesota. *Journal of the American Academy of Dermatology*. 2015;72(2):302-9.
41. Canueto J, Cardenoso E, Garcia JL, Santos-Briz A, Castellanos-Martin A, Fernandez-Lopez E, et al. Epidermal growth factor receptor expression is associated with poor outcome in cutaneous squamous cell carcinoma. *British Journal of Dermatology*. 2017;176(5):1279-87.
42. Cañueto J, Martín-Vallejo J, Cardenoso-Álvarez E, Fernández-López E, Pérez-Losada J, Román-Curto C. Rapid growth rate is associated with poor prognosis in cutaneous squamous cell carcinoma. *Clinical and Experimental Dermatology*. 2018;43(8):876-82.
43. Carter JB, Johnson MM, Chua TL, Karia PS, Schmults CD. Outcomes of primary cutaneous squamous cell carcinoma with perineural invasion an 11-year cohort study. *JAMA Dermatology*. 2013;149(1):35-42.
44. Chabrilac E, Lusque A, Cavallier Z, Lopez R, Filleron T, Sarini J, et al. Cutaneous squamous cell carcinoma tumour size is associated with sentinel lymph node metastasis in a cohort of 69 patients. *Acta Dermato-Venereologica*. 2019;99(13):1241-5.
45. Conde-Ferreiros A, Corchete LA, Puebla-Tornero L, Corchado-Cobos R, Garcia-Sancha N, Roman-Curto C, et al. Definition of prognostic subgroups in the T3 stage of the eighth edition of the American Joint Committee on Cancer staging system for cutaneous squamous cell carcinoma: Tentative T3 stage subclassification. *Journal of the American Academy of Dermatology*. 2021;85(5):1168-77.
46. Durham AB, Lowe L, Malloy KM, McHugh JB, Bradford CR, Chubb H, et al. Sentinel lymph node biopsy for cutaneous squamous cell carcinoma on the head and neck. *JAMA Otolaryngology - Head and Neck Surgery*. 2016;142(12):1171-6.
47. Dzubow LM, Rigel DS, Robins P. Risk factors for local recurrence of primary cutaneous squamous cell carcinomas. Treatment by microscopically controlled excision. *Archives of Dermatology*. 1982;118(11):900-2.
48. Erkan S, Savundra JM, Wood B, Acharya AN, Rajan GP. Clinical perineural invasion of the trigeminal and facial nerves in cutaneous head and neck squamous cell carcinoma: Outcomes and prognostic implications of multimodality and salvage treatment. *Head and Neck*. 2017;39(7):1280-6.
49. Estall V, Allen A, Webb A, Bressel M, McCormack C, Spillane J. Outcomes following management of squamous cell carcinoma of the scalp: A retrospective series of 235 patients treated at the Peter MacCallum Cancer Centre. *Australasian Journal of Dermatology*. 2017;58(4):e207-e15.
50. Farberg AS, Hall MA, Douglas L, Covington KR, Kurley SJ, Cook RW, et al. Integrating the 40-gene expression profile (40-GEP) test into management of high-risk cutaneous squamous cell carcinoma. *Journal of Clinical and Aesthetic Dermatology*. 2020;12(5 SUPPL):S18.
51. Gore SM, Shaw D, Martin RC, Kelder W, Roth K, Uren R, et al. Prospective study of sentinel node biopsy for high-risk cutaneous squamous cell carcinoma of the head and neck. *Head Neck*. 2016;38 Suppl 1:E884-9.
52. Grover P, Flukes S, Jacques A, Leedman S, Lindsay A, White R, et al. Clinicopathological characteristics and clinical morbidity in high-risk head and neck cutaneous squamous cell carcinoma patients in Western Australia. *Internal medicine journal*. 2021;20.
53. Gupta N, Weitzman RE, Murad F, Koyfman SA, Smile TD, Chang MS, et al. Identifying Brigham and Women's Hospital stage T2a cutaneous squamous cell carcinomas at risk of poor outcomes. *Journal of the American Academy of Dermatology*. 2021.
54. Haisma MS, Plaat BEC, Bijl HP, Roodenburg JLN, Diercks GFH, Romeijn TR, et al. Multivariate analysis of potential risk factors for lymph node metastasis in patients with cutaneous squamous cell carcinoma of the head and neck. *Journal of the American Academy of Dermatology*. 2016;75(4):722-30.
55. Harris BN, Bayoumi A, Rao S, Moore MG, Farwell DG, Bewley AF. Factors Associated with Recurrence and Regional Adenopathy for Head and Neck Cutaneous Squamous Cell Carcinoma. *Otolaryngology - Head and Neck Surgery (United States)*. 2017;156(5):863-9.
56. Harris BN, Pipkorn P, Nguyen KNB, Jackson RS, Rao S, Moore MG, et al. Association of Adjuvant Radiation Therapy with Survival in Patients with Advanced Cutaneous Squamous Cell Carcinoma of the Head and Neck. *JAMA Otolaryngology - Head and Neck Surgery*. 2019;145(2):153-8.
57. Haug K, Breuninger H, Metzler G, Eigentler T, Eichner M, Hafner HM, et al. Prognostic Impact of Perineural Invasion in Cutaneous Squamous Cell Carcinoma: Results of a Prospective Study of 1,399 Tumors. *Journal of Investigative Dermatology*. 2020;140(10):1968-75.

58. Hausauer AK, Maurer T, Leslie KS, Parvataneni R, Stuart SE, Chren MM. Recurrence after treatment of cutaneous basal cell and squamous cell carcinomas in patients infected with human immunodeficiency virus. *JAMA Dermatology*. 2013;149(2):239-41.
59. Jackson JE, Dickie GJ, Wiltshire KL, Keller J, Tripcony L, Poulsen MG, et al. Radiotherapy for perineural invasion in cutaneous head and neck carcinomas: Toward a risk-adapted treatment approach. *Head and Neck*. 2009;31(5):604-10.
60. Jambusaria-Pahlajani A, Kanetsky PA, Karia PS, Hwang WT, Gelfand JM, Whalen FM, et al. Evaluation of AJCC tumor staging for cutaneous squamous cell carcinoma and a proposed alternative tumor staging system. *JAMA Dermatology*. 2013;149(4):402-10.
61. Jenkins G, Smith AB, Kanatas AN, Houghton DR, Telfer MR. Anatomical restrictions in the surgical excision of scalp squamous cell carcinomas: Does this affect local recurrence and regional nodal metastases? *International Journal of Oral and Maxillofacial Surgery*. 2014;43(2):142-6.
62. Kadakia S, Ducic Y, Marra D, Chan D, Saman M, Sawhney R, et al. Cutaneous squamous cell carcinoma of the scalp in the immunocompromised patient: review of 53 cases. *Oral and maxillofacial surgery*. 2016;20(2):171-5.
63. Kamiya S, Kato J, Kamiya T, Yamashita T, Sumikawa Y, Hida T, et al. Association between PD-L1 expression and lymph node metastasis in cutaneous squamous cell carcinoma. *Asia-Pacific Journal of Clinical Oncology*. 2020;16(2):e108-e12.
64. Karia PS, Jambusaria-Pahlajani A, Harrington DP, Murphy GF, Qureshi AA, Schmults CD. Evaluation of American Joint Committee on Cancer, International Union Against Cancer, and Brigham and Women's Hospital tumor staging for cutaneous squamous cell carcinoma. *Journal of Clinical Oncology*. 2014;32(4):327-34.
65. Kato J, Hida T, Sugita S, Hasegawa T, Kamiya S, Horimoto K, et al. Cytokeratin 19 expression is a risk factor for metastasis in cutaneous squamous cell carcinoma. *Journal of the European Academy of Dermatology and Venereology*. 2018;32(7):e299-e301.
66. Knuutila JS, Riihilä P, Kurki S, Nissinen L, Kähäri VM. Risk Factors and Prognosis for Metastatic Cutaneous Squamous Cell Carcinoma: A Cohort Study. *Acta Derm Venereol*. 2020;100(16):adv00266.
67. Korhonen N, Ylitalo L, Luukkaala T, Itkonen J, Häihälä H, Jernman J, et al. Recurrent and Metastatic Cutaneous Squamous Cell Carcinomas in a Cohort of 774 Patients in Finland. *Acta Derm Venereol*. 2020;100(8):adv00121.
68. Krediet JT, Beyer M, Lenz K, Ulrich C, Lange-Asschenfeldt B, Stockfleth E, et al. Sentinel lymph node biopsy and risk factors for predicting metastasis in cutaneous squamous cell carcinoma. *Br J Dermatol*. 2015;172(4):1029-36.
69. Kreppel M, Krakowezki A, Kreppel B, Drebber U, Wedemeyer I, Mauch C, et al. Podoplanin expression in cutaneous head and neck squamous cell carcinoma--prognostic value and clinicopathologic implications. *J Surg Oncol*. 2013;107(4):376-83.
70. Kropp L, Balamucki CJ, Morris CG, Kirwan J, Cognetta AB, Stoer CB, et al. Mohs resection and postoperative radiotherapy for head and neck cancers with incidental perineural invasion. *Am J Otolaryngol*. 2013;34(5):373-7.
71. Kyrgidis A, Tzellos TG, Kechagias N, Patrikidou A, Xirou P, Kitikidou K, et al. Cutaneous squamous cell carcinoma (SCC) of the head and neck: risk factors of overall and recurrence-free survival. *Eur J Cancer*. 2010;46(9):1563-72.
72. Leibovitch I, Huilgol SC, Selva D, Hill D, Richards S, Paver R. Cutaneous squamous cell carcinoma treated with Mohs micrographic surgery in Australia II. Perineural invasion. *Journal of the American Academy of Dermatology*. 2005;53(2):261-6.
73. Leus AJG, Haisma MS, Terra JB, Diercks GFH, Van Kester MS, Halmos GB, et al. Age-related Differences in Tumour Characteristics and Prognostic Factors for Disease Progression in Cutaneous Squamous Cell Carcinoma of the Head and Neck. *Acta Derm Venereol*. 2021.
74. Matsumoto A, Li JN, Matsumoto M, Pineider J, Nijhawan RI, Srivastava D. Factors predicting outcomes of patients with high-risk squamous cell carcinoma treated with Mohs micrographic surgery. *J Am Acad Dermatol*. 2021;85(3):588-95.
75. Mayo E, Sharma S, Horne J, Yuen HM, Lee A, Gulati A. Squamous cell carcinoma of the pinna: which histological features could be used to predict prognosis? *Br J Oral Maxillofac Surg*. 2017;55(5):524-9.
76. McLaughlin EJ, Miller L, Shin TM, Sobanko JF, Cannady SB, Miller CJ, et al. Rate of regional nodal metastases of cutaneous squamous cell carcinoma in the immunosuppressed patient. *American Journal of Otolaryngology - Head and Neck Medicine and Surgery*. 2017;38(3):325-8.

77. Mo J, Miller CJ, Karakousis G, Keele L, Cohen J, Krouse RS. The scalp is a high-risk site for cutaneous squamous cell carcinoma metastasis. *J Am Acad Dermatol.* 2021;84(6):1742-4.
78. Moore BA, Weber RS, Prieto V, El-Naggar A, Holsinger FC, Zhou X, et al. Lymph node metastases from cutaneous squamous cell carcinoma of the head and neck. *Laryngoscope.* 2005;115(9):1561-7.
79. Mourouzis C, Boynton A, Grant J, Umar T, Wilson A, Macpheson D, et al. Cutaneous head and neck SCCs and risk of nodal metastasis - UK experience. *J Craniomaxillofac Surg.* 2009;37(8):443-7.
80. Mullen JT, Feng L, Xing Y, Mansfield PF, Gershenwald JE, Lee JE, et al. Invasive squamous cell carcinoma of the skin: defining a high-risk group. *Ann Surg Oncol.* 2006;13(7):902-9.
81. Nelson TG, Ashton RE. Low incidence of metastasis and recurrence from cutaneous squamous cell carcinoma found in a UK population: Do we need to adjust our thinking on this rare but potentially fatal event? *J Surg Oncol.* 2017;116(6):783-8.
82. Obermeier K, Tröltzsch M, Ehrenfeld M, Smolka W. Risk factors for lymph node metastases of facial cutaneous squamous cell carcinoma. *J Craniomaxillofac Surg.* 2017;45(8):1138-42.
83. Ogawa T, Kiuru M, Konia TH, Fung MA. Acantholytic squamous cell carcinoma is usually associated with hair follicles, not acantholytic actinic keratosis, and is not "high risk": Diagnosis, management, and clinical outcomes in a series of 115 cases. *J Am Acad Dermatol.* 2017;76(2):327-33.
84. Oh Y, Kim J, Zheng Z, Kim SK, Chung KY, Roh MR. Risk factors for recurrence in cutaneous squamous cell carcinoma after Mohs micrographic surgery: A retrospective review of 237 Asian patients. *J Dermatol.* 2020;47(1):72-7.
85. Saito Y, Fujikawa H, Takatsuka S, Abe R, Takenouchi T. Risk factors for lymph node metastasis in cutaneous squamous cell carcinoma: a long-term retrospective study of Japanese patients. *Int J Clin Oncol.* 2021;26(3):606-12.
86. Sayan A, Paraneetharan S, Ilankovan V. Importance of anatomical site in the metastases of auricular cutaneous squamous cell carcinoma: an observational study. *Br J Oral Maxillofac Surg.* 2020;58(7):824-8.
87. Takeda A, Akimoto M, Nemoto M, Kounoike N, Uchinuma E. Preoperative risk factors of lymph node metastasis in cutaneous squamous cell carcinoma. *J Plast Surg Hand Surg.* 2013;47(3):204-8.
88. Tanamal PJ, Geng CX, Nijhawan RI, Wynings E, Balachandra S, Myers LL, et al. Oncologic outcomes in primary squamous cell carcinoma of the auricle: a retrospective cohort analysis. *Eur Arch Otorhinolaryngol.* 2022;279(1):335-41.
89. Thomas CJ, Wood GC, Marks VJ. Mohs micrographic surgery in the treatment of rare aggressive cutaneous tumors: the Geisinger experience. *Dermatol Surg.* 2007;33(3):333-9.
90. Tschetter AJ, Campoli MR, Zitelli JA, Brodland DG. Long-term clinical outcomes of patients with invasive cutaneous squamous cell carcinoma treated with Mohs micrographic surgery: A 5-year, multicenter, prospective cohort study. *J Am Acad Dermatol.* 2020;82(1):139-48.
91. van Lee CB, Roorda BM, Wakkee M, Voorham Q, Mooyaart AL, de Vijlder HC, et al. Recurrence rates of cutaneous squamous cell carcinoma of the head and neck after Mohs micrographic surgery vs. standard excision: a retrospective cohort study. *Br J Dermatol.* 2019;181(2):338-43.
92. Venables ZC, Autier P, Nijsten T, Wong KF, Langan SM, Rous B, et al. Nationwide Incidence of Metastatic Cutaneous Squamous Cell Carcinoma in England. *JAMA Dermatol.* 2019;155(3):298-306.
93. Warren TA, Panizza B, Porceddu SV, Gandhi M, Patel P, Wood M, et al. Outcomes after surgery and postoperative radiotherapy for perineural spread of head and neck cutaneous squamous cell carcinoma. *Head Neck.* 2016;38(6):824-31.
94. Wu MP, Sethi R, Emerick KS. Sentinel lymph node biopsy for high-risk cutaneous squamous cell carcinoma of the head and neck. *Laryngoscope.* 2020;130(1):108-14.
95. Xiong DD, Beal BT, Varra V, Rodriguez M, Cundall H, Woody NM, et al. Outcomes in intermediate-risk squamous cell carcinomas treated with Mohs micrographic surgery compared with wide local excision. *J Am Acad Dermatol.* 2020;82(5):1195-204.
96. Xu MJ, Lazar AA, Garsa AA, Arron ST, Ryan WR, El-Sayed IH, et al. Major prognostic factors for recurrence and survival independent of the American Joint Committee on Cancer eighth edition staging system in patients with cutaneous squamous cell carcinoma treated with multimodality therapy. *Head and Neck.* 2018;40(7):1406-14.
97. Warren TA, Whiteman DC, Porceddu SV, Panizza BJ. Insight into the epidemiology of cutaneous squamous cell carcinoma with perineural spread. *Head Neck.* 2016;38(9):1416-20.
98. Agar NJM, Kirton C, Patel RS, Martin RCW, Angelo N, Emanuel PO. Predicting lymph node metastases in cutaneous squamous cell carcinoma: Use of a morphological scoring system. *New Zealand Medical Journal.* 2015;128(1411):59-67.

99. Fujimoto M, Yamamoto Y, Takai T, Fujimoto N, Ogawa K, Yoshikawa T, et al. Tumor Budding Is an Objective High-risk Factor Associated With Metastasis and Poor Clinical Prognosis in Cutaneous Squamous Cell Carcinoma Sized <4 cm. *American Journal of Surgical Pathology*. 2019;43(7):975-83.
100. García-Pedrero JM, Martínez-Cambor P, Diaz-Coto S, Munguía-Calzada P, Vallina-Alvarez A, Vazquez-Lopez F, et al. Tumor programmed cell death ligand 1 expression correlates with nodal metastasis in patients with cutaneous squamous cell carcinoma of the head and neck. *Journal of the American Academy of Dermatology*. 2017;77(3):527-33.
101. Gonzalez-Guerrero M, Martínez-Cambor P, Vivanco B, Fernández-Vega I, Munguía-Calzada P, Gonzalez-Gutierrez MP, et al. The adverse prognostic effect of tumor budding on the evolution of cutaneous head and neck squamous cell carcinoma. *Journal of the American Academy of Dermatology*. 2017;76(6):1139-45.
102. Hernández-Ruiz E, Hernández-Muñoz I, Masferrer E, Ferrándiz-Pulido C, Andrades E, Gimeno J, et al. A Myxoid Fibrotic Reaction Pattern is Associated with Metastatic Risk in Cutaneous Squamous Cell Carcinoma. *Acta Derm Venereol*. 2019;99(1):89-94.
103. Karayannopoulou G, Panteris E, Kanitakis J. Tumour budding is an independent predictive factor of cutaneous squamous-cell carcinoma aggressiveness. *Anticancer Research*. 2020;40(5):2695-9.
104. Khandelwal AR, Ma X, Egan P, Kaskas NM, Moore-Medlin T, Caldito G, et al. Biomarker and Pathologic Predictors of Cutaneous Squamous Cell Carcinoma Aggressiveness. *Otolaryngology - Head and Neck Surgery (United States)*. 2016;155(2):281-8.
105. Lobl M, Feinstein S, Lauer S, Sutton A, Wysong A. Recurrence Status, Perineural Invasion, and Hypothyroidism Are Associated With Lymph Node Metastasis in Cutaneous Squamous Cell Carcinoma: A Case-Control Study. *Dermatol Surg*. 2022.
106. Munguía-Calzada P, Fernández-Vega I, Martínez-Cambor P, Díaz-Coto S, García-Pedrero JM, Vivanco B, et al. Correlation of focal adhesion kinase expression with nodal metastasis in patients with head and neck cutaneous squamous cell carcinoma. *Head and Neck*. 2019;41(5):1290-6.
107. Canueto J, Burguillo J, Moyano-Bueno D, Vinolas-Cuadros A, Conde-Ferreiros A, Corchete-Sanchez LA, et al. Comparing the eighth and the seventh editions of the American Joint Committee on Cancer staging system and the Brigham and Women's Hospital alternative staging system for cutaneous squamous cell carcinoma: Implications for clinical practice. *Journal of the American Academy of Dermatology*. 2019;80(1):106-13.e2.
108. Cheng JY, Li FY, Ko CJ, Colegio OR. Cutaneous squamous cell carcinomas in solid organ transplant recipients compared with immunocompetent patients. *JAMA Dermatology*. 2018;154(1):60-6.
109. Gonzalez JL, Cunningham K, Silverman R, Madan E, Nguyen BM. Case-Control Study of Tumor Stage-Dependent Outcomes for Cutaneous Squamous Cell Carcinoma in Immunosuppressed and Immunocompetent Patients. *Dermatologic Surgery*. 2019;45(12):1467-76.
110. Kanitakis J, Karayannopoulou G, Roux A, Euvrard S. Histopathologic features predictive of aggressiveness of post-transplant cutaneous squamous-cell carcinomas. *Anticancer Research*. 2015;35(4):2305-8.
111. Karayannopoulou G, Euvrard S, Kanitakis J. Tumour budding correlates with aggressiveness of cutaneous squamous-cell carcinoma. *Anticancer Research*. 2016;36(9):4781-5.
112. Krediet JT, Kanitakis J, Bob A, Schmitter J, Krediet AC, Röver J, et al. Prognostic value of the area and density of lymphatic vessels in cutaneous squamous cell carcinoma. *J Dtsch Dermatol Ges*. 2016;14(11):1114-21.
113. Peat B, Insull P, Ayers R. Risk stratification for metastasis from cutaneous squamous cell carcinoma of the head and neck. *ANZ J Surg*. 2012;82(4):230-3.
114. Santos-Juanes J, Fernández-Vega I, Lorenzo-Herrero S, Sordo-Bahamonde C, Martínez-Cambor P, García-Pedrero JM, et al. Lectin-like transcript 1 (LLT1) expression is associated with nodal metastasis in patients with head and neck cutaneous squamous cell carcinoma. *Arch Dermatol Res*. 2019;311(5):369-76.
115. Sepehripour S, Dawood O, Hatter S, Williams L, Zahd Z, Liebmann R, et al. An assessment of histological margins and recurrence of completely excised cutaneous SCC. *J Plast Reconstr Aesthet Surg*. 2020;73(5):899-903.
116. Howard B, Armand C, Stoddard E, Green H, Heaton H, Hong H. Superficial x-ray in the treatment of basal and squamous cell carcinomas: A viable option in select patients. *Journal of the American Academy of Dermatology*. 2012;1):AB158.
117. Hernandez-Machin B, Borrego L, Gil-garcia M, Hernandez BH. Office-based radiation therapy for cutaneous carcinoma: Evaluation of 710 treatments. *International Journal of Dermatology*. 2007;46(5):453-9.
118. Kim SK, Barker CA. Outcomes of radiation therapy for advanced T3/T4 nonmelanoma cutaneous squamous cell and basal cell carcinoma. *Br J Dermatol*. 2018;178(1):e30-e2.
119. Košec A, Svetina L, Lukšić I. Significance of clinical stage, extent of surgery and outcome in cutaneous squamous cell carcinoma of the head and neck. *Int J Oral Maxillofac Surg*. 2013;42(1):82-8.

120. Leibovitch I, Huilgol SC, Selva D, Hill D, Richards S, Paver R. Cutaneous squamous cell carcinoma treated with Mohs micrographic surgery in Australia I. Experience over 10 years. *Journal of the American Academy of Dermatology*. 2005;53(2):253-60.
121. Choi SH, Kim KH, Song KH. Effect of methyl aminolevulinate photodynamic therapy with and without ablative fractional laser treatment in patients with microinvasive squamous cell carcinoma: A randomized clinical trial. *JAMA Dermatology*. 2017;153(3):289-95.
122. Ruiz ES, Koyfman SA, Que SKT, Kass J, Schmultz CD. Evaluation of the utility of localized adjuvant radiation for node-negative primary cutaneous squamous cell carcinoma with clear histologic margins. *J Am Acad Dermatol*. 2020;82(2):420-9.
123. Diana L, Ramelyte E, Dummer R, Imhof L. Radiotherapy in periocular cutaneous malignancies: A retrospective study. *Journal of the Dermatology Nurses' Association Conference: 24th World Congress of Dermatology Milan Italy*. 2020;12(2).
124. Hutting KH, Bos PG, Kibbelaar RE, Veeger N, Marck KW, Mouës CM. Effective excision of cutaneous squamous cell carcinoma of the face using analysis of intra-operative frozen sections from the whole specimen. *J Surg Oncol*. 2018;117(3):473-8.
125. Stanciu A, Turcu CEF, Zota A, Tebeica T, Leventer M, Bobirca F. Surgical outcomes of more than 1300 cases of Mohs micrographic surgeries from a private Mohs clinic in Romania. *Chirurgia (Romania)*. 2020;115(1):69-79.
126. Fernanda Sachse M, Labareda J, Lima Duque JM, Cirne de Castro JL. Cryosurgery of malignant cutaneous tumours. Six years' experience. *Skin Cancer*. 1988;3(2):103-10.
127. Marrazzo G, Zitelli JA, Brodland D. Clinical outcomes in high-risk squamous cell carcinoma patients treated with Mohs micrographic surgery alone. *J Am Acad Dermatol*. 2019;80(3):633-8.
128. Pereira MF, Morgado MA. Cryosurgery of malignant cutaneous tumours - Ten years experience. *Skin Cancer*. 1994;9(4):179-85.
129. Turner RJ, Leonard N, Malcolm AJ, Lawrence CM, Dahl MG. A retrospective study of outcome of Mohs' micrographic surgery for cutaneous squamous cell carcinoma using formalin fixed sections. *Br J Dermatol*. 2000;142(4):752-7.
